# Supplementary material
Source: ML conference proceedings conference paper supplement (https://www.ecva.net/papers/eccv_2020/papers_ECCV/html/123620681_ECCV_2020_paper.php)
Supplement: Supplementary file 2 [file 123620681-supp.zip › 00_main_supp.tex]

% updated April 2002 by Antje Endemann
% Based on CVPR 07 and LNCS, with modifications by DAF, AZ and elle, 2008 and AA, 2010, and CC, 2011; TT, 2014; AAS, 2016; AAS, 2020

\documentclass[runningheads]{llncs}
\usepackage{graphicx, subcaption}
\usepackage{comment}
\usepackage{amsmath,amssymb} % define this before the line numbering.
\usepackage{color}
\usepackage[bottom]{footmisc}
\input{macros.tex}
% INITIAL SUBMISSION - The following two lines are NOT commented
% CAMERA READY - Comment OUT the following two lines
% \usepackage{ruler}
% \usepackage[width=122mm,left=12mm,paperwidth=146mm,height=193mm,top=12mm,paperheight=217mm]{geometry}


\begin{document}
% \renewcommand\thelinenumber{\color[rgb]{0.2,0.5,0.8}\normalfont\sffamily\scriptsize\arabic{linenumber}\color[rgb]{0,0,0}}
% \renewcommand\makeLineNumber {\hss\thelinenumber\ \hspace{6mm} \rlap{\hskip\textwidth\ \hspace{6.5mm}\thelinenumber}}
% \linenumbers
\pagestyle{headings}
\mainmatter
\def\ECCVSubNumber{2866}  % Insert your submission number here


\title{Deep Image Compression using Decoder Side Information} % Replace with your title

% % % INITIAL SUBMISSION 
% %\begin{comment}
% \titlerunning{ECCV-20 submission ID \ECCVSubNumber} 
% \authorrunning{ECCV-20 submission ID \ECCVSubNumber} 
% \author{Anonymous ECCV submission}
% \institute{Paper ID \ECCVSubNumber}
% %\end{comment}
%******************

% CAMERA READY SUBMISSION
% \begin{comment}
\titlerunning{Deep Image Compression using Decoder Side Information}
% If the paper title is too long for the running head, you can set
% an abbreviated paper title here
%
\author{Sharon Ayzik \and Shai Avidan}
%
\authorrunning{S. Ayzik and S. Avidan}
% First names are abbreviated in the running head.
% If there are more than two authors, 'et al.' is used.
%
\institute{Dept. of Electrical Engineering\\ 
Tel Aviv University \\
\email{ayziksha@mail.tau.ac.il , avidan@eng.tau.ac.il}}
% \url{http://www.springer.com/gp/computer-science/lncs} \and
% ABC Institute, Rupert-Karls-University Heidelberg, Heidelberg, Germany\\
% \email{\{abc,lncs\}@uni-heidelberg.de}}
% \end{comment}
%******************
\maketitle
% \input{01_abstract.tex}

% \input{02_introduction.tex}

% \input{03_background.tex}

% \input{04_method.tex}

% \input{05_experiments.tex}

% \input{06_conclusions.tex}


% % \clearpage
% % ---- Bibliography ----
% %
% % BibTeX users should specify bibliography style 'splncs04'.
% % References will then be sorted and formatted in the correct style.
% %

% \bibliographystyle{splncs04}
% % \bibliography{06_references}
% \bibliography{07_references.bbl}

% \clearpage
\input{08_supplementary.tex}
\end{document}
