# Supplementary material
Source: ML conference proceedings conference paper supplement (https://www.ecva.net/papers/eccv_2020/papers_ECCV/html/123620681_ECCV_2020_paper.php)
Supplement: Supplementary file 2 [file 123620681-supp.zip › Images/supplementary/fig_correlation_maps.tex]

\begin{figure*}[!b]

\begin{center}
\begin{tabular}{c c}

$X_{dec}$ & $Y_{dec}$ \\
\includegraphics[width=0.48\linewidth]{Images/supplementary/correlation/2900_bpp007_xdec_marked.png} &
\includegraphics[width=0.48\linewidth]{Images/supplementary/correlation/2900_bpp007_ydec.png} \\

Correlation map without mask & Correlation map with mask \\
\includegraphics[width=0.48\linewidth]{Images/supplementary/correlation/2900_bpp007_map_no_mask_crop.png} &
\includegraphics[width=0.48\linewidth]{Images/supplementary/correlation/2900_bpp007_map_crop.png} \\

\multicolumn{2}{c}{$Y$ with patch selection marked} \\
\multicolumn{2}{c}{\includegraphics[width=0.98\linewidth]{Images/supplementary/correlation/2900_y_with_patch_minus6_marked.png}} \\

$Y_{syn}$ without mask & $Y_{syn}$ with mask \\
\includegraphics[width=0.48\linewidth]{Images/supplementary/correlation/2900_bpp007_si_no_mask_marked.png} &
\includegraphics[width=0.48\linewidth]{Images/supplementary/correlation/2900_bpp007_si_marked.png} \\

\end{tabular}
\caption{Top to bottom left to right: $X_{dec}$ image with target patch marked in magenta that is compared to all possible patches in $Y_{dec}$ image (top right) and the output, is the correlation map (second row) with and without 2D Gaussian mask (yellow equals high correlation). Third row, $Y$ image with maximum score patches marked (green patch - when using the mask, red patch - without the mask). Bottom, $Y_{syn}$ image created with and without the use of the 2D Gaussian mask (the matching patches marked - red patch selected without the mask, green patch selected when using the 2D Gaussian mask).}

\label{fig:correlation_maps}
\end{center}
\end{figure*}
