# Supplementary material
Source: ML conference proceedings conference paper supplement (https://www.ecva.net/papers/eccv_2020/papers_ECCV/html/123620681_ECCV_2020_paper.php)
Supplement: Supplementary file 2 [file 123620681-supp.zip › Images/supplementary/fig_supp_datset_example.tex]

\begin{figure}[htb!]
\begin{center}
\begin{tabular}{c}

{\em KITTI Stereo}  \\
\includegraphics[width=\linewidth]{Images/supplementary/dataset_example/000129_07_L.png} \\
\includegraphics[width=\linewidth]{Images/supplementary/dataset_example/000129_07_R.png} \\
\\
{\em KITTI General}  \\
\includegraphics[width=\linewidth]{Images/supplementary/dataset_example/000129_07_L.png} \\
\includegraphics[width=\linewidth]{Images/supplementary/dataset_example/000129_10_R.png} \\

\end{tabular}
\caption{Examples from both datasets. Both examples present the same $X$ (top image in each pair), while the side information $Y$ is taken according to the dataset's settings. Top pair - {\em KITTI Stereo} - the different angle between images can be seen. Bottom pair - {\em KITTI General} - in addition to the two cameras different angle, object can appear in different scale (such as the car) and some of the object are missing in the matching pair image (such as the traffic sign).}

\label{fig:supp_dataset_examples}
\end{center}
\end{figure}
