# Supplementary material
Source: ML conference proceedings conference paper supplement (https://www.ecva.net/papers/eccv_2020/papers_ECCV/html/123620681_ECCV_2020_paper.php)
Supplement: Supplementary file 2 [file 123620681-supp.zip › Images/supplementary/fig_supp_examples_general.tex]

\begin{figure*}[htb!]
\begin{center}
\begin{tabular}{c}

\textbf{Without SI} 0.03931 bpp \\
\includegraphics[width=\linewidth]{Images/supplementary/examples_KITTI_general/1_xdec_0039310154_me.png} \\

\textbf{With SI} 0.03693 bpp \\
\includegraphics[width=\linewidth]{Images/supplementary/examples_KITTI_general/1_xfinal_003693916_me.png} \\

\textbf{Without SI} 0.03105 bpp \\
\includegraphics[width=\linewidth]{Images/supplementary/examples_KITTI_general/2660_xdec_003105176.png} \\

\textbf{With SI} 0.02874 bpp \\
\includegraphics[width=\linewidth]{Images/supplementary/examples_KITTI_general/2660_xfinal_0028744653.png} \\

\end{tabular}
\caption{Reconstruction comparison in low bit rates (that BPG failed to reach) over {\em KITTI General} with and without side information.}

\label{fig:supp_examples_general_fullsize}
\end{center}
\end{figure*}


\begin{figure*}[htb!]
\begin{center}
\begin{tabular}{c c}

\textbf{Without SI} 0.02789 bpp & \textbf{With SI} 0.02644 bpp\\
% \textbf{Without SI} & \textbf{With SI}\\ 
\includegraphics[width=0.4\linewidth]{Images/supplementary/examples_KITTI_general/27_xdec_0027899388_me_crop.png} &
\includegraphics[width=0.4\linewidth]{Images/supplementary/examples_KITTI_general/27_xfinal_0026449291_me_crop.png} \\
% 0.02789 bpp & 0.02644 bpp\\ 

\textbf{Without SI} 0.03377 bpp & \textbf{With SI} 0.03164 bpp \\ 
\includegraphics[width=0.4\linewidth]{Images/supplementary/examples_KITTI_general/35_xdec_0033773165_me_crop.png} &
\includegraphics[width=0.4\linewidth]{Images/supplementary/examples_KITTI_general/35_xfinal_003164405_me_crop.png} \\
% 0.03377 bpp & 0.03164 bpp \\ 

\textbf{Without SI} 0.02601 bpp & \textbf{With SI} 0.02536 bpp \\
\includegraphics[width=0.4\linewidth]{Images/supplementary/examples_KITTI_general/47_xdec_002601288_me_crop.png} &
\includegraphics[width=0.4\linewidth]{Images/supplementary/examples_KITTI_general/47_xfinal_0025369821_me_crop.png} \\
% 0.02601 bpp & 0.02536 bpp \\

\end{tabular}
\caption{Reconstruction comparison in low bit rates (that BPG failed to reach) over {\em KITTI General} with and without side information.}

\label{fig:supp_examples_general}
\end{center}
\end{figure*}


\begin{figure*}[htb!]
\begin{center}
\begin{tabular}{c c}


\textbf{Without SI} 0.03133 bpp & \textbf{With SI} 0.02981 bpp \\
\includegraphics[width=0.4\linewidth]{Images/supplementary/examples_KITTI_general/52_xdec_0031331692_me_crop.png} &
\includegraphics[width=0.4\linewidth]{Images/supplementary/examples_KITTI_general/52_xfinal_0029812355_me_crop.png} \\

 \textbf{Without SI} 0.02786 bpp & \textbf{With SI} 0.02760 bpp \\
\includegraphics[width=0.4\linewidth]{Images/supplementary/examples_KITTI_general/58_xdec_002786204_me_crop.png} &
\includegraphics[width=0.4\linewidth]{Images/supplementary/examples_KITTI_general/58_xfinal_0027607944_me_crop.png} \\

\textbf{Without SI} 0.03461 bpp & \textbf{With SI} 0.03228 bpp \\
\includegraphics[width=0.4\linewidth]{Images/supplementary/examples_KITTI_general/63_xdec_0034615412_me_crop.png} &
\includegraphics[width=0.4\linewidth]{Images/supplementary/examples_KITTI_general/63_xfinal_0032288425_me_crop.png} \\

%Black car with sign
% \textbf{Without SI} 0.03447 bpp & \textbf{With SI} 0.03299 bpp \\
% \includegraphics[width=0.4\linewidth]{Images/supplementary/examples_KITTI_general/34_xdec_0034476_me_crop.png} &
% \includegraphics[width=0.4\linewidth]{Images/supplementary/examples_KITTI_general/34_xfinal_003299897_me_crop.png} \\

%fence with sign
% \textbf{Without SI} 0.03204 bpp & \textbf{With SI} 0.03062 bpp \\
% \includegraphics[width=0.4\linewidth]{Images/supplementary/examples_KITTI_general/50_xdec_0032043748_me_crop.png} &
% \includegraphics[width=0.4\linewidth]{Images/supplementary/examples_KITTI_general/50_xfinal_0030627048_me_crop.png} \\

%Whales sign
% \textbf{Without SI} 0.03017 bpp & \textbf{With SI} 0.02828 bpp \\
% \includegraphics[width=0.4\linewidth]{Images/supplementary/examples_KITTI_general/46_xdec_0030177921_me_crop.png} &
% \includegraphics[width=0.4\linewidth]{Images/supplementary/examples_KITTI_general/46_xfinal_0028288195_me_crop.png} \\

\end{tabular}
\caption{Additional reconstruction comparison in low bit rates (that BPG failed to reach) over {\em KITTI General} with and without side information.}

\label{fig:supp_examples_general_cont}
\end{center}
\end{figure*}
