# Supplementary material
Source: ML conference proceedings conference paper supplement (https://www.ecva.net/papers/eccv_2020/papers_ECCV/html/123620681_ECCV_2020_paper.php)
Supplement: Supplementary file 2 [file 123620681-supp.zip › Images/supplementary/fig_supp_examples_general_all4.tex]

\begin{figure*}[!htb]
\begin{center}
\begin{tabular}{c}

\textbf{JPEG 2000} 0.06319 bpp \\
\includegraphics[width=\linewidth]{Images/supplementary/examples_KITTI_general_all4/1243_x_jp2k_006319.png} \\

\textbf{BPG} 0.06644 bpp \\
\includegraphics[width=\linewidth]{Images/supplementary/examples_KITTI_general_all4/1243_x_bpg_006644.png} \\

\textbf{Without SI} 0.06029 bpp \\
\includegraphics[width=\linewidth]{Images/supplementary/examples_KITTI_general_all4/1243_xdec_0060292404.png} \\

\textbf{With SI} 0.05881 bpp \\
\includegraphics[width=\linewidth]{Images/supplementary/examples_KITTI_general_all4/1243_xfinal_0058818784.png} \\

\end{tabular}
\caption{Reconstruction comparison to the baseline model, JPEG 2000 and BPG over {\em KITTI General}.}

\label{fig:supp_examples_general_fullsize_all4}
\end{center}
\end{figure*}


\begin{figure*}[!htb]
\begin{center}
\begin{tabular}{c c c c}

% \textbf{JPEG 2000} 0.06227 bpp & \textbf{BPG} 0.06058 bpp & \textbf{Without SI} 0.05812 bpp & \textbf{With SI} 0.05742 bpp \\
\textbf{JPEG 2000} & \textbf{BPG} & \textbf{Without SI} & \textbf{With SI}\\
\includegraphics[width=0.2\linewidth]{Images/supplementary/examples_KITTI_general_all4/2797_x_jp2k_006227_crop_crop2.png} &
\includegraphics[width=0.2\linewidth]{Images/supplementary/examples_KITTI_general_all4/2797_x_bpg_006058_crop_crop2.png} &
\includegraphics[width=0.2\linewidth]{Images/supplementary/examples_KITTI_general_all4/2797_xdec_0058128808_crop_crop2.png} &
\includegraphics[width=0.2\linewidth]{Images/supplementary/examples_KITTI_general_all4/2797_xfinal_005742502_crop_crop2.png} \\
0.06227 bpp & 0.06058 bpp & 0.05812 bpp & 0.05742 bpp \\

% \textbf{JPEG 2000} 0.04861 bpp & \textbf{BPG} 0.04551 bpp & \textbf{Without SI} 0.04507 bpp & \textbf{With SI} 0.04486 bpp \\

\includegraphics[width=0.2\linewidth]{Images/supplementary/examples_KITTI_general_all4/13_x_me_jp2k_004861_crop_crop2.png} &
\includegraphics[width=0.2\linewidth]{Images/supplementary/examples_KITTI_general_all4/13_x_me_bpg_004551_crop_crop2.png} &
\includegraphics[width=0.2\linewidth]{Images/supplementary/examples_KITTI_general_all4/13_xdec_0045077953_me_crop_crop2.png} &
\includegraphics[width=0.2\linewidth]{Images/supplementary/examples_KITTI_general_all4/13_xfinal_0044861265_me_crop_crop2.png} \\
0.04861 bpp & 0.04551 bpp & 0.04507 bpp & 0.04486 bpp \\

% \textbf{JPEG 2000} 0.06150 bpp & \textbf{BPG} 0.06379 bpp & \textbf{Without SI} 0.06037 bpp & \textbf{With SI} 0.05723 bpp \\

\includegraphics[width=0.2\linewidth]{Images/supplementary/examples_KITTI_general_all4/125_x_me_jp2k_006150_crop.png} &
\includegraphics[width=0.2\linewidth]{Images/supplementary/examples_KITTI_general_all4/125_x_me_bpg_006379_crop.png} &
\includegraphics[width=0.2\linewidth]{Images/supplementary/examples_KITTI_general_all4/125_xdec_0060373608_me_crop.png} &
\includegraphics[width=0.2\linewidth]{Images/supplementary/examples_KITTI_general_all4/125_xfinal_0057230514_me_crop.png} \\
0.06150 bpp & 0.06379 bpp & 0.06037 bpp & 0.05723 bpp \\


% \textbf{JPEG 2000} 0.05370 bpp & \textbf{BPG} 0.05470 bpp & \textbf{Without SI} 0.05109 bpp & \textbf{With SI} 0.04837 bpp \\

\includegraphics[width=0.2\linewidth]{Images/supplementary/examples_KITTI_general_all4/29_x_me_jp2k_005370_crop_crop2.png} &
\includegraphics[width=0.2\linewidth]{Images/supplementary/examples_KITTI_general_all4/29_x_me_bpg_005470_crop_crop2.png} &
\includegraphics[width=0.2\linewidth]{Images/supplementary/examples_KITTI_general_all4/29_xdec_005109943_me_crop_crop2.png} &
\includegraphics[width=0.2\linewidth]{Images/supplementary/examples_KITTI_general_all4/29_xfinal_0048376635_me_crop_crop2.png} \\
0.05370 bpp & 0.05470 bpp & 0.05109 bpp & 0.04837 bpp \\

% \textbf{JPEG 2000} 0.04567 bpp & \textbf{BPG} 0.04971 bpp & \textbf{Without SI} 0.04564 bpp & \textbf{With SI} 0.04560 bpp \\

\includegraphics[width=0.2\linewidth]{Images/supplementary/examples_KITTI_general_all4/59_x_me_jp2k_004557_crop.png} &
\includegraphics[width=0.2\linewidth]{Images/supplementary/examples_KITTI_general_all4/59_x_me_bpg_004971_crop.png} &
\includegraphics[width=0.2\linewidth]{Images/supplementary/examples_KITTI_general_all4/59_xdec_0045342818_me_crop.png} &
\includegraphics[width=0.2\linewidth]{Images/supplementary/examples_KITTI_general_all4/59_xfinal_0045600913_me_crop.png} \\
0.04567 bpp & 0.04971 bpp & 0.04564 bpp & 0.04560 bpp \\

% \textbf{JPEG 2000} 0.06215 bpp & \textbf{BPG} 0.06244 bpp & \textbf{Without SI} 0.05613 bpp & \textbf{With SI} 0.05711 bpp \\

\includegraphics[width=0.2\linewidth]{Images/supplementary/examples_KITTI_general_all4/115_x_me_jp2k_006215_crop.png} &
\includegraphics[width=0.2\linewidth]{Images/supplementary/examples_KITTI_general_all4/115_x_me_bpg_006244_crop.png} &
\includegraphics[width=0.2\linewidth]{Images/supplementary/examples_KITTI_general_all4/115_xdec_0056135885_me_crop.png} &
\includegraphics[width=0.2\linewidth]{Images/supplementary/examples_KITTI_general_all4/115_xfinal_005711205_me_crop.png} \\
0.06215 bpp & 0.06244 bpp & 0.05613 bpp & 0.05711 bpp \\

%Blue car
% \textbf{JPEG 2000} 0.05423 bpp & \textbf{BPG} 0.05370 bpp & \textbf{Without SI} 0.05254 bpp & \textbf{With SI} 0.04977 bpp \\

% \includegraphics[width=0.2\linewidth]{Images/supplementary/examples_KITTI_general_all4/4338_x_jp2k_005423_crop.png} &
% \includegraphics[width=0.2\linewidth]{Images/supplementary/examples_KITTI_general_all4/4338_x_bpg_005370_crop.png} &
% \includegraphics[width=0.2\linewidth]{Images/supplementary/examples_KITTI_general_all4/4338_xdec_0052549038_crop.png} &
% \includegraphics[width=0.2\linewidth]{Images/supplementary/examples_KITTI_general_all4/4338_xfinal_0049770083_crop.png} \\
\end{tabular}
\caption{Our suggested method compared with the baseline model, JPEG 2000, and BPG over {\em KITTI General}.}

\label{fig:supp_examples_general_all4}
\end{center}
\end{figure*}


% \begin{figure*}[!htb]
% \begin{center}
% \begin{tabular}{c c }

% \textbf{Without SI} 0.06029 bpp & \textbf{With SI} 0.05881 bpp \\
% \includegraphics[width=0.49\linewidth]{Images/supplementary/examples_KITTI_general_all4/1243_xdec_0060292404.png} &
% \includegraphics[width=0.49\linewidth]{Images/supplementary/examples_KITTI_general_all4/1243_xfinal_0058818784.png} \\

% \textbf{JPEG 2000} 0.06319 bpp & \textbf{BPG} 0.06644 bpp \\
% \includegraphics[width=0.49\linewidth]{Images/supplementary/examples_KITTI_general_all4/1243_x_jp2k_006319.png} &
% \includegraphics[width=0.49\linewidth]{Images/supplementary/examples_KITTI_general_all4/1243_x_bpg_006644.png} \\

% \end{tabular}
% \caption{Reconstruction comparison to the baseline model, JPEG 2000 and BPG over {\em KITTI General}.}

% \label{fig:supp_examples_general_fullsize_all4}
% \end{center}
% \end{figure*}
