# Supplementary material
Source: ML conference proceedings conference paper supplement (https://www.ecva.net/papers/eccv_2020/papers_ECCV/html/123620681_ECCV_2020_paper.php)
Supplement: Supplementary file 2 [file 123620681-supp.zip › Images/supplementary/fig_supp_examples_stereo.tex]

\begin{figure*}[htb!]
\begin{center}
\begin{tabular}{c}

\textbf{Without SI} 0.03437 bpp \\
\includegraphics[width=\linewidth]{Images/supplementary/examples_KITTI_stereo/328_xdec_003437284.png} \\

\textbf{With SI} 0.03082 bpp \\
\includegraphics[width=\linewidth]{Images/supplementary/examples_KITTI_stereo/328_xfinal_0030829288.png} \\

\textbf{Without SI} 0.02608 bpp \\
\includegraphics[width=\linewidth]{Images/supplementary/examples_KITTI_stereo/111_xdec_0026080817_me.png} \\

\textbf{With SI} 0.02487 bpp \\
\includegraphics[width=\linewidth]{Images/supplementary/examples_KITTI_stereo/111_xfinal_0024876218_me.png} \\

\end{tabular}
\caption{Reconstruction comparison in low bit rates (that BPG failed to reach) over {\em KITTI Steereo} with and without side information.}

\label{fig:supp_examples_stereo_fullsize}
\end{center}
\end{figure*}
