# Supplementary material
Source: ML conference proceedings conference paper supplement (https://www.ecva.net/papers/eccv_2020/papers_ECCV/html/123620681_ECCV_2020_paper.php)
Supplement: Supplementary file 2 [file 123620681-supp.zip › Images/supplementary/fig_supp_examples_stereo_all4.tex]

\begin{figure}[!htb]
\begin{center}
\begin{tabular}{c }

\textbf{JPEG 2000} 0.05225 bpp \\
\includegraphics[width=\linewidth]{Images/supplementary/examples_KITTI_stereo_all4/155_x_jp2k_005225.png} \\

\textbf{BPG} 0.05770 bpp \\
\includegraphics[width=\linewidth]{Images/supplementary/examples_KITTI_stereo_all4/155_x_bpg_005770.png} \\

\textbf{Without SI} 0.05241 bpp \\
\includegraphics[width=\linewidth]{Images/supplementary/examples_KITTI_stereo_all4/155_xdec_005241834.png} \\

\textbf{With SI} 0.05119 bpp \\
\includegraphics[width=\linewidth]{Images/supplementary/examples_KITTI_stereo_all4/155_xfinal_0051195394.png} \\

\end{tabular}
\caption{Reconstruction comparison to the baseline model, JPEG 2000 and BPG over {\em KITTI Stereo}.}

\label{fig:supp_examples_stereo_fullsize_all4}
\end{center}
\end{figure}


\begin{figure*}[!htb]
\begin{center}
\begin{tabular}{c c c c}

% \textbf{JPEG 2000} 0.05125 bpp & \textbf{BPG} 0.04998 bpp & \textbf{Without SI} 0.05127 bpp & \textbf{With SI} 0.04743 bpp \\
\textbf{JPEG 2000} & \textbf{BPG} & \textbf{Without SI} & \textbf{With SI}\\

\includegraphics[width=0.2\linewidth]{Images/supplementary/examples_KITTI_stereo_all4/36_x_me_jp2k_005125_crop.png} &
\includegraphics[width=0.2\linewidth]{Images/supplementary/examples_KITTI_stereo_all4/36_x_me_bpg_004998_crop.png} &
\includegraphics[width=0.2\linewidth]{Images/supplementary/examples_KITTI_stereo_all4/36_xdec_0051271997_me_crop.png} &
\includegraphics[width=0.2\linewidth]{Images/supplementary/examples_KITTI_stereo_all4/36_xfinal_004743475_me_crop.png} \\
0.05125 bpp & 0.04998 bpp & 0.05127 bpp & 0.04743 bpp \\

% \textbf{JPEG 2000} 0.06048 bpp & \textbf{BPG} 0.05790 bpp & \textbf{Without SI} 0.05620 bpp & \textbf{With SI} 0.05585 bpp \\

\includegraphics[width=0.2\linewidth]{Images/supplementary/examples_KITTI_stereo_all4/121_x_jp2k_006048_crop.png} &
\includegraphics[width=0.2\linewidth]{Images/supplementary/examples_KITTI_stereo_all4/121_x_bpg_005790_crop.png} &
\includegraphics[width=0.2\linewidth]{Images/supplementary/examples_KITTI_stereo_all4/121_xdec_0056208216_crop.png} &
\includegraphics[width=0.2\linewidth]{Images/supplementary/examples_KITTI_stereo_all4/121_xfinal_0055852156_crop.png} \\
0.06048 bpp & 0.05790 bpp & 0.05620 bpp & 0.05585 bpp \\

% \textbf{JPEG 2000} 0.05321 bpp & \textbf{BPG} 0.05341 bpp & \textbf{Without SI} 0.04858 bpp & \textbf{With SI} 0.04762 bpp \\

\includegraphics[width=0.2\linewidth]{Images/supplementary/examples_KITTI_stereo_all4/0_x_me_jp2k_005321_crop.png} &
\includegraphics[width=0.2\linewidth]{Images/supplementary/examples_KITTI_stereo_all4/0_x_me_bpg_005341_crop.png} &
\includegraphics[width=0.2\linewidth]{Images/supplementary/examples_KITTI_stereo_all4/0_xdec_0048583426_me_crop.png} &
\includegraphics[width=0.2\linewidth]{Images/supplementary/examples_KITTI_stereo_all4/0_xfinal_004762899_me_crop.png} \\
0.05321 bpp & 0.05341 bpp & 0.04858 bpp & 0.04762 bpp \\

% \textbf{JPEG 2000} 0.05319 bpp & \textbf{BPG} 0.05335 bpp & \textbf{Without SI} 0.05197 bpp & \textbf{With SI} 0.04793 bpp \\

\includegraphics[width=0.2\linewidth]{Images/supplementary/examples_KITTI_stereo_all4/138_x_jp2k_005319_crop.png} &
\includegraphics[width=0.2\linewidth]{Images/supplementary/examples_KITTI_stereo_all4/138_x_bpg_005335_crop.png} &
\includegraphics[width=0.2\linewidth]{Images/supplementary/examples_KITTI_stereo_all4/138_xdec_0051976908_crop.png} &
\includegraphics[width=0.2\linewidth]{Images/supplementary/examples_KITTI_stereo_all4/138_xfinal_004793801_crop.png} \\
0.05319 bpp & 0.05335 bpp & 0.05197 bpp & 0.04793 bpp \\

% \textbf{JPEG 2000} 0.05340 bpp & \textbf{BPG} 0.05435 bpp & \textbf{Without SI} 0.05099 bpp & \textbf{With SI} 0.04765 bpp \\

\includegraphics[width=0.2\linewidth]{Images/supplementary/examples_KITTI_stereo_all4/343_x_jp2k_005304_crop.png} &
\includegraphics[width=0.2\linewidth]{Images/supplementary/examples_KITTI_stereo_all4/343_x_bpg_005435_crop.png} &
\includegraphics[width=0.2\linewidth]{Images/supplementary/examples_KITTI_stereo_all4/343_xdec_0050599568_crop.png} &
\includegraphics[width=0.2\linewidth]{Images/supplementary/examples_KITTI_stereo_all4/343_xfinal_004765772_crop.png} \\
0.05340 bpp & 0.05435 bpp & 0.05099 bpp & 0.04765 bpp \\
%Heart sign:
% \textbf{JPEG 2000} 0.05141 bpp & \textbf{BPG} 0.05692 bpp & \textbf{Without SI} 0.04778 bpp & \textbf{With SI} 0.04634 bpp \\

% \includegraphics[width=0.2\linewidth]{Images/supplementary/examples_KITTI_stereo_all4/30_x_me_jp2k_005141_crop_crop2.png} &
% \includegraphics[width=0.2\linewidth]{Images/supplementary/examples_KITTI_stereo_all4/30_x_me_bpg_005692_crop_crop2.png} &
% \includegraphics[width=0.2\linewidth]{Images/supplementary/examples_KITTI_stereo_all4/30_xdec_004778061_me_crop_crop2.png} &
% \includegraphics[width=0.2\linewidth]{Images/supplementary/examples_KITTI_stereo_all4/30_xfinal_0046346657_me_crop_crop2.png} \\

%Silver car:
% \textbf{JPEG 2000} 0.05788 bpp & \textbf{BPG} 0.05645 bpp & \textbf{Without SI} 0.05304 bpp & \textbf{With SI} 0.05249 bpp \\

% \includegraphics[width=0.2\linewidth]{Images/supplementary/examples_KITTI_stereo_all4/116_x_jp2k_005788_crop.png} &
% \includegraphics[width=0.2\linewidth]{Images/supplementary/examples_KITTI_stereo_all4/116_x_bpg_005645_crop.png} &
% \includegraphics[width=0.2\linewidth]{Images/supplementary/examples_KITTI_stereo_all4/116_xdec_0053046007_crop.png} &
% \includegraphics[width=0.2\linewidth]{Images/supplementary/examples_KITTI_stereo_all4/116_xfinal_005249669_crop.png} \\

%White car side
% \textbf{JPEG 2000} 0.06128 bpp & \textbf{BPG} 0.06467 bpp & \textbf{Without SI} 0.05703 bpp & \textbf{With SI} 0.05659 bpp \\

% \includegraphics[width=0.2\linewidth]{Images/supplementary/examples_KITTI_stereo_all4/115_x_jp2k_006128_crop.png} &
% \includegraphics[width=0.2\linewidth]{Images/supplementary/examples_KITTI_stereo_all4/115_x_bpg_006467_crop.png} &
% \includegraphics[width=0.2\linewidth]{Images/supplementary/examples_KITTI_stereo_all4/115_xdec_0057003118_crop.png} &
% \includegraphics[width=0.2\linewidth]{Images/supplementary/examples_KITTI_stereo_all4/115_xfinal_005659621_crop.png} \\

% \textbf{JPEG 2000} 0.05098 bpp & \textbf{BPG} 0.04841 bpp & \textbf{Without SI} 0.04683 bpp & \textbf{With SI} 0.04681 bpp \\

% \includegraphics[width=0.2\linewidth]{Images/supplementary/examples_KITTI_stereo_all4/135_x_jp2k_005098_crop.png} &
% \includegraphics[width=0.2\linewidth]{Images/supplementary/examples_KITTI_stereo_all4/135_x_bpg_004841_crop.png} &
% \includegraphics[width=0.2\linewidth]{Images/supplementary/examples_KITTI_stereo_all4/135_xdec_0046630725_crop.png} &
% \includegraphics[width=0.2\linewidth]{Images/supplementary/examples_KITTI_stereo_all4/135_xfinal_0046811275_crop.png} \\

\end{tabular}
\caption{Our suggested method compared with the baseline model, JPEG 2000, and BPG over {\em KITTI Stereo}.}

\label{fig:supp_examples_stereo_all4}
\end{center}
\end{figure*}


% \begin{figure*}[!htb]
% \begin{center}
% \begin{tabular}{c c }

% \textbf{Without SI} 0.05241 bpp & \textbf{With SI} 0.05119 bpp \\
% \includegraphics[width=0.49\linewidth]{Images/supplementary/examples_KITTI_stereo_all4/155_xdec_005241834.png} &
% \includegraphics[width=0.49\linewidth]{Images/supplementary/examples_KITTI_stereo_all4/155_xfinal_0051195394.png} \\

% \textbf{JPEG 2000} 0.05225 bpp & \textbf{BPG} 0.05770 bpp \\
% \includegraphics[width=0.49\linewidth]{Images/supplementary/examples_KITTI_stereo_all4/155_x_jp2k_005225.png} &
% \includegraphics[width=0.49\linewidth]{Images/supplementary/examples_KITTI_stereo_all4/155_x_bpg_005770.png} \\

% \end{tabular}
% \caption{Reconstruction comparison to the baseline model, JPEG 2000 and BPG over {\em KITTI Stereo}.}

% \label{fig:supp_examples_stereo_fullsize_all4}
% \end{center}
% \end{figure*}
