# Supplementary material
Source: ML conference proceedings conference paper supplement (https://www.ecva.net/papers/eccv_2020/papers_ECCV/html/123620681_ECCV_2020_paper.php)
Supplement: Supplementary file 2 [file 123620681-supp.zip › macros.tex]

\long\def\ignorethis#1{}

% colors
\usepackage{color}
\definecolor{gray}{rgb}{0.35,0.35,0.35}
\definecolor{red}{rgb}{1,0,0}
\definecolor{dark-green}{rgb}{0,0.4,0}
\definecolor{dark-pink}{rgb}{0.78,0.08,0.52}
\definecolor{blue}{rgb}{0,0,1}
\definecolor{orange}{rgb}{1,0.55,0}
\definecolor{white}{rgb}{1,1,1}
\definecolor{black}{rgb}{1,1,1}
\definecolor{dark-brown}{rgb}{0.2,0.1,0}


\newcommand{\todo}[1]{{\color{red}TODO: #1}\normalfont}
\newcommand{\sharon}[1]{{\color{dark-green}Sharon: #1}\normalfont}
\newcommand{\shai}[1]{{\color{orange}Shai: #1}\normalfont}
%%% comment \ShowNotes out to remove all colored comments defined with \newcommand below %%%
% \newcommand*{\ShowNotes}{}

\ifdefined\ShowNotes
\newcommand{\whitetxt}[1]{{\color{white}#1}\normalfont}

\newcommand{\jbox}[2]{
  \fbox{%
  \begin{minipage}{#1}%
  \hfill\vspace{#2}%
  \end{minipage}%
  }}
\else
  \newcommand{\colornote}[3]{}
\fi
% colored comments


% subfigures with automatic width
\newbox\jsavebox
\newcommand{\jsubfig}[2]{%
\sbox\jsavebox{#1}%
\parbox[t]{\wd\jsavebox}{\centering\usebox\jsavebox\\#2}%
}

\newcommand{\jcell}[1]{%
  {%
 \renewcommand{\arraystretch}{0}%
 \begin{tabular}{@{}c@{}}%
#1%
\end{tabular}%
}}
