# Supplementary material
Source: ML conference proceedings conference paper supplement (https://www.ecva.net/papers/eccv_2020/papers_ECCV/html/123620681_ECCV_2020_paper.php)

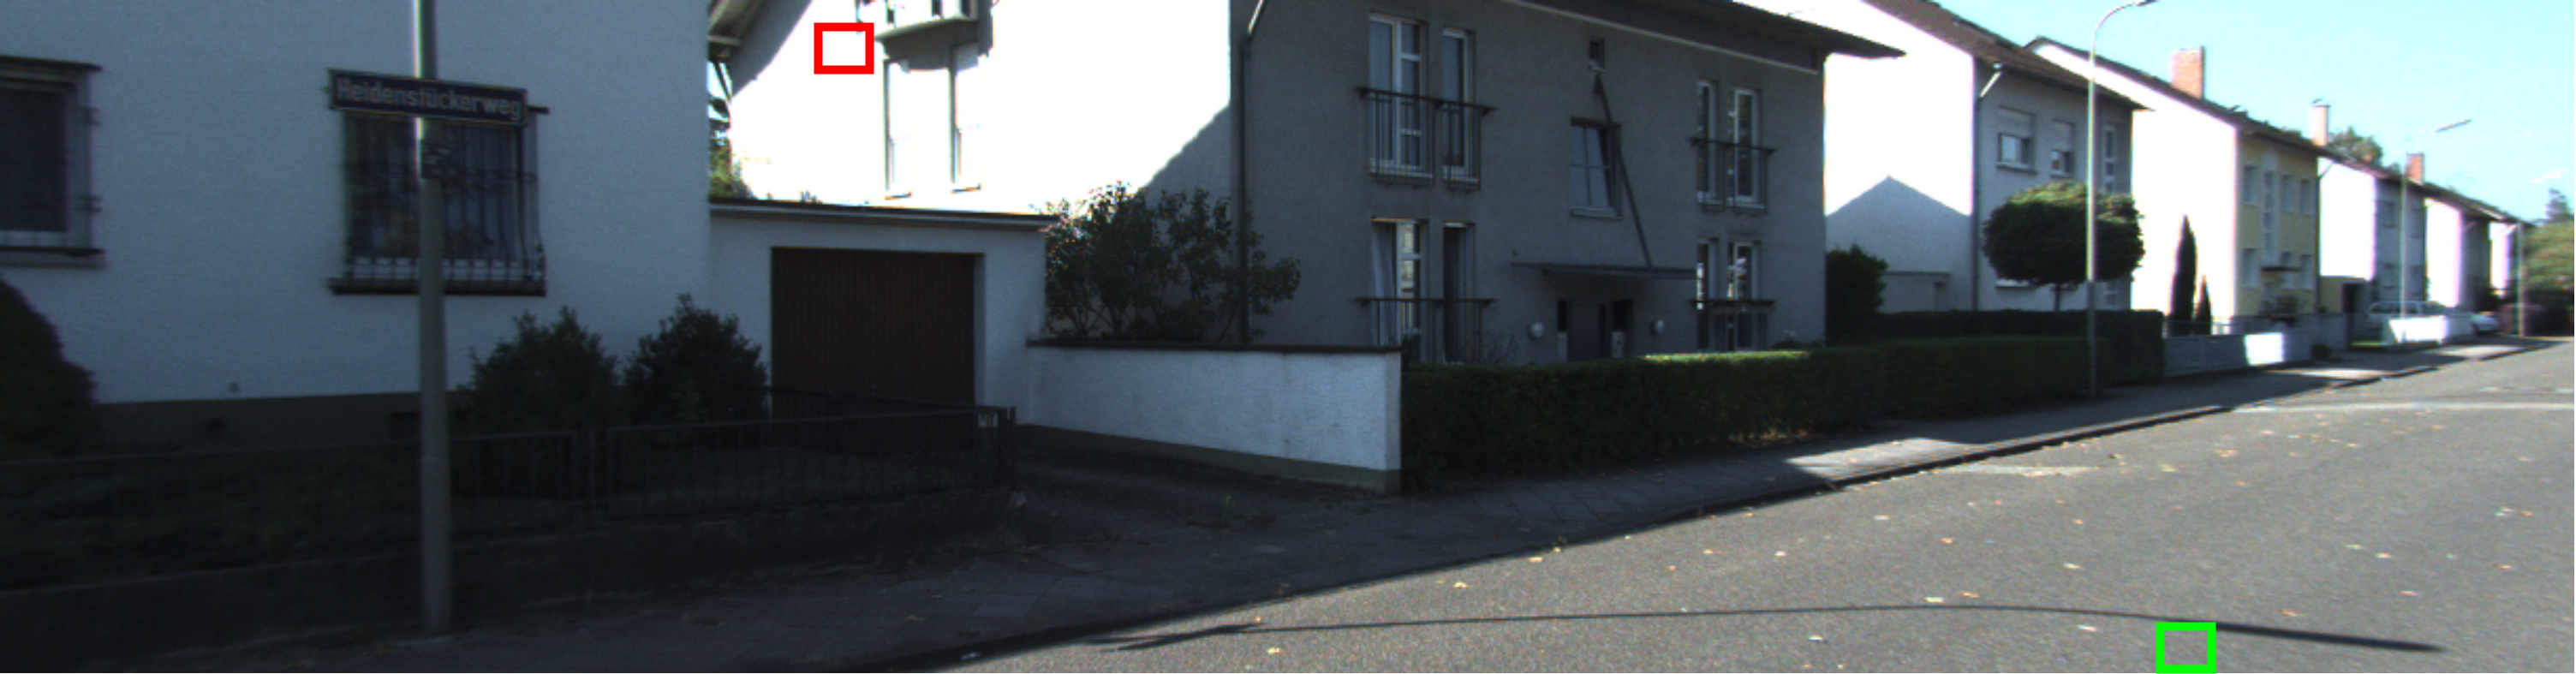

Supplement: Supplementary file 2 [file 123620681-supp.zip › Images/supplementary/correlation/2900_y_with_patch_minus6_marked.png]

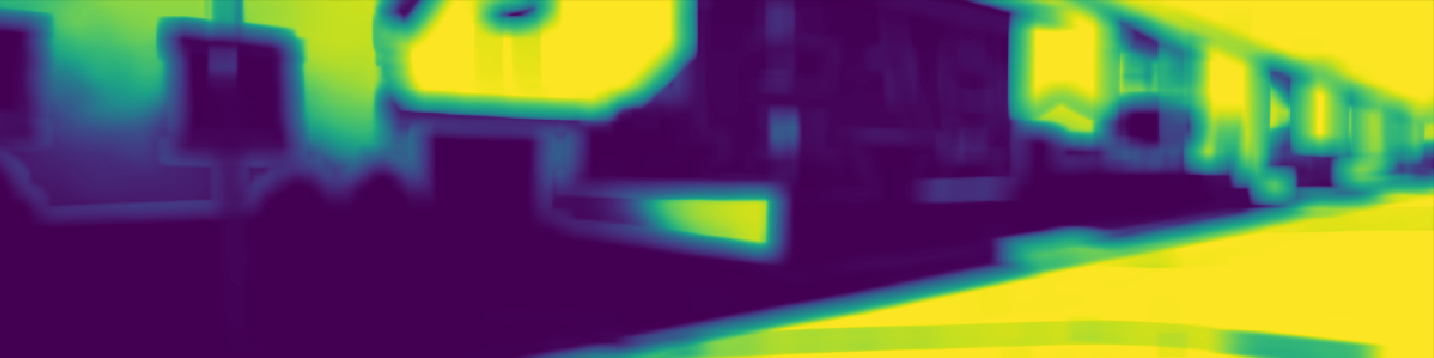

Supplement: Supplementary file 2 [file 123620681-supp.zip › Images/supplementary/correlation/2900_bpp007_map_no_mask_crop.png]

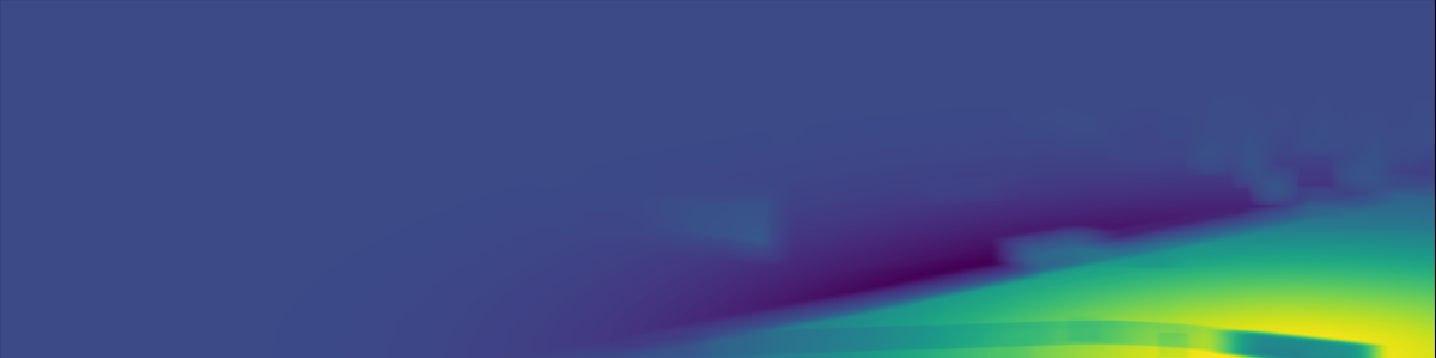

Supplement: Supplementary file 2 [file 123620681-supp.zip › Images/supplementary/correlation/2900_bpp007_map_crop.png]

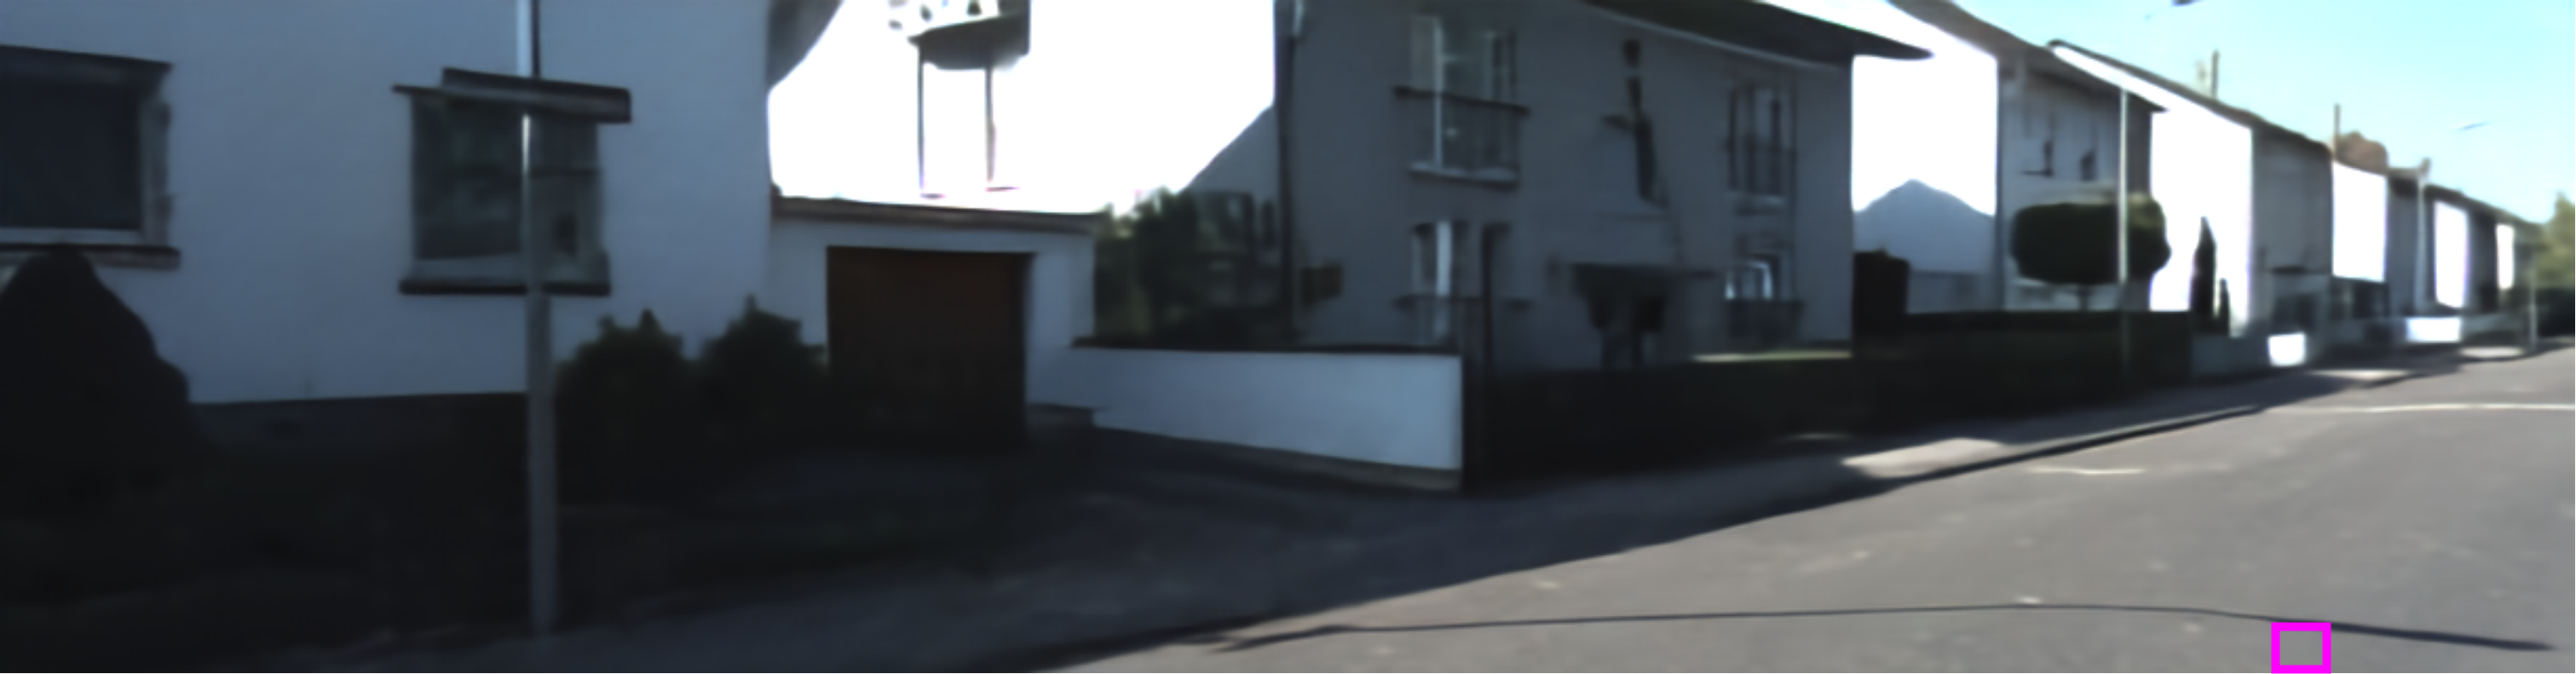

Supplement: Supplementary file 2 [file 123620681-supp.zip › Images/supplementary/correlation/2900_bpp007_xdec_marked.png]

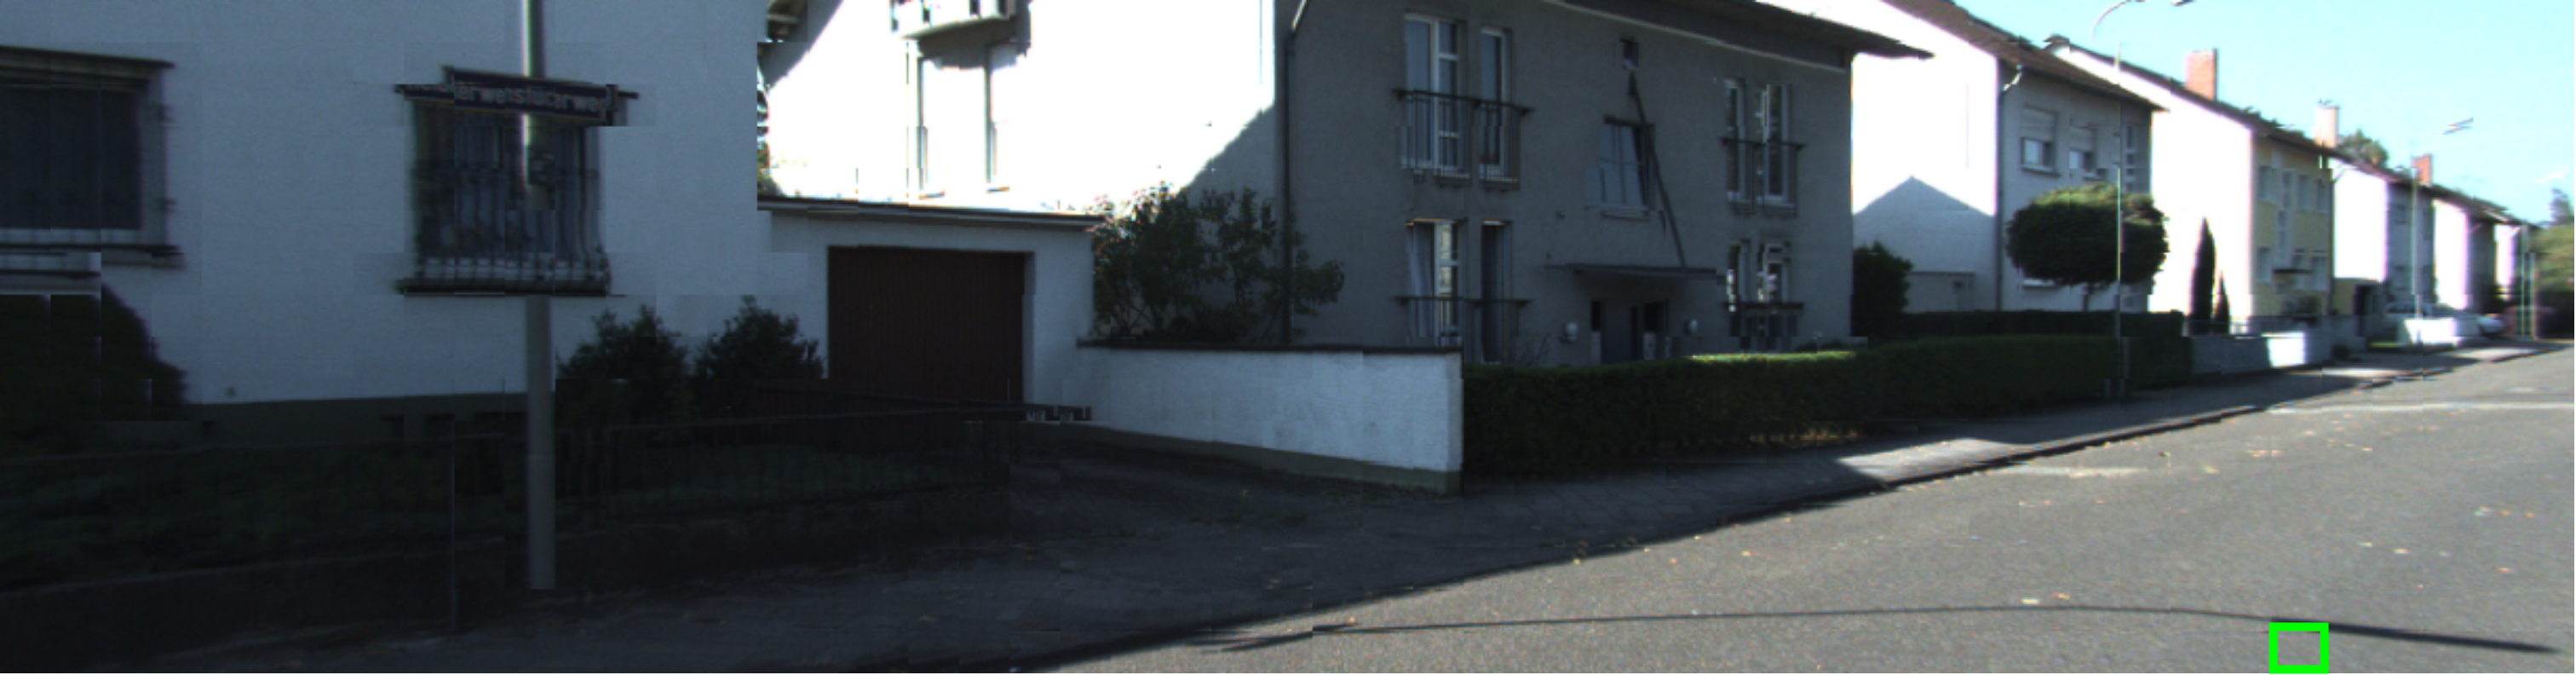

Supplement: Supplementary file 2 [file 123620681-supp.zip › Images/supplementary/correlation/2900_bpp007_si_marked.png]

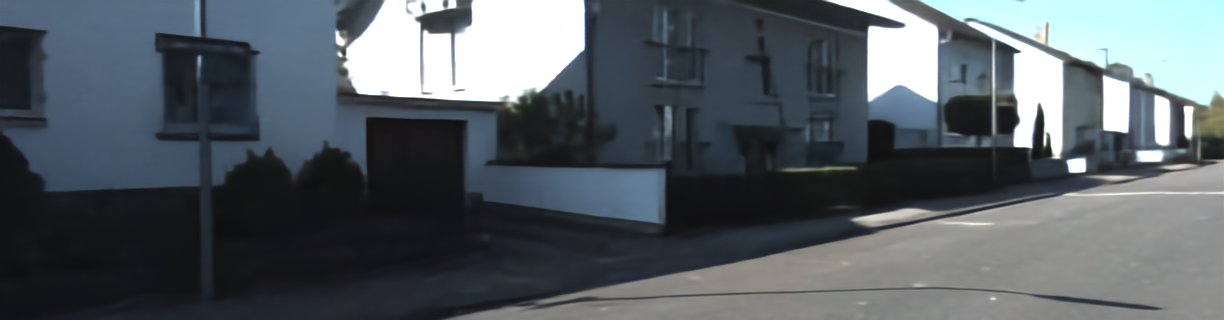

Supplement: Supplementary file 2 [file 123620681-supp.zip › Images/supplementary/correlation/2900_bpp007_ydec.png]

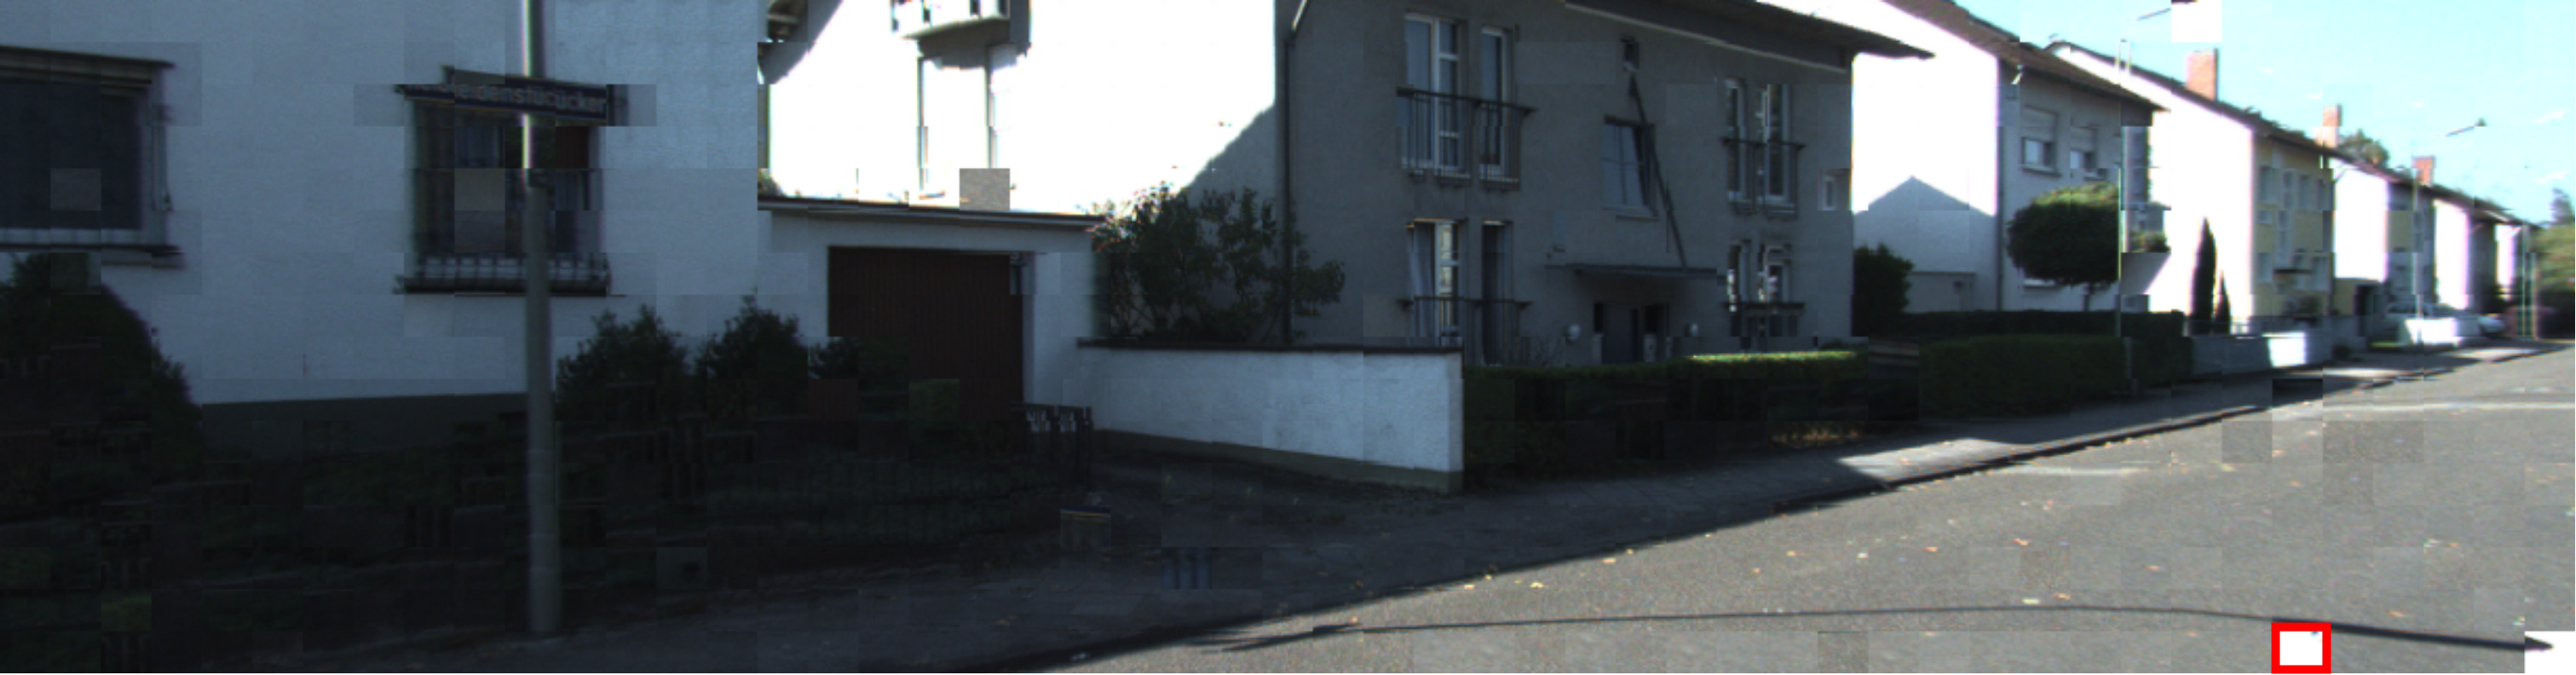

Supplement: Supplementary file 2 [file 123620681-supp.zip › Images/supplementary/correlation/2900_bpp007_si_no_mask_marked.png]

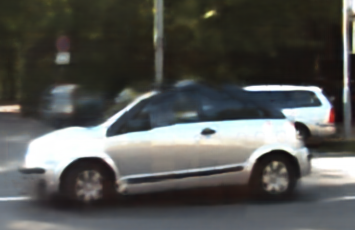

Supplement: Supplementary file 2 [file 123620681-supp.zip › Images/supplementary/examples_KITTI_general/27_xfinal_0026449291_me_crop.png]

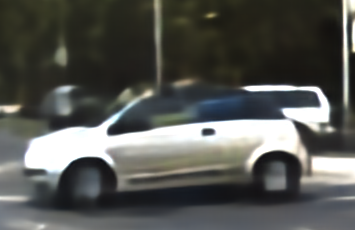

Supplement: Supplementary file 2 [file 123620681-supp.zip › Images/supplementary/examples_KITTI_general/27_xdec_0027899388_me_crop.png]

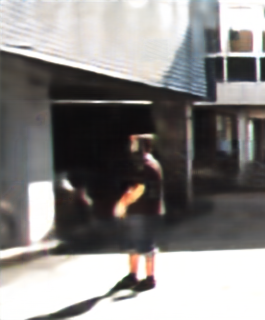

Supplement: Supplementary file 2 [file 123620681-supp.zip › Images/supplementary/examples_KITTI_general/35_xfinal_003164405_me_crop.png]

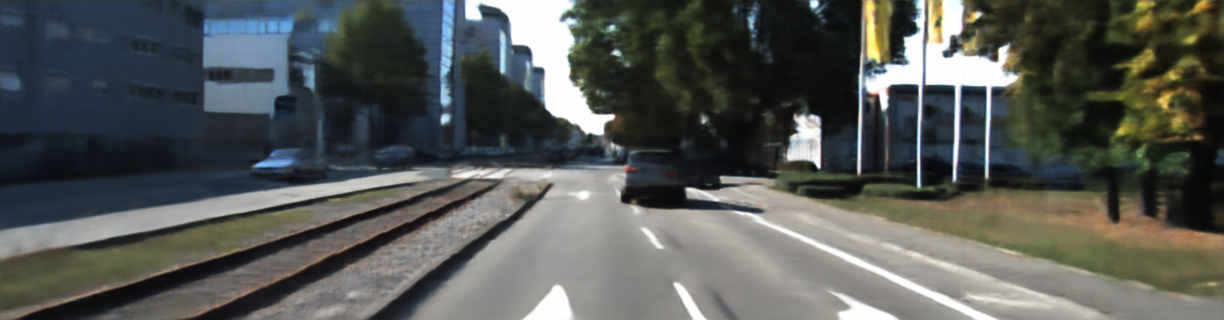

Supplement: Supplementary file 2 [file 123620681-supp.zip › Images/supplementary/examples_KITTI_general/2660_xfinal_0028744653.png]

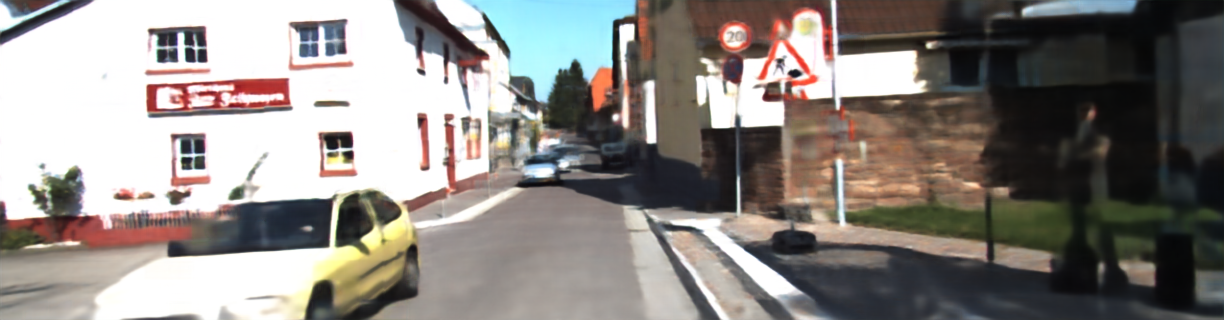

Supplement: Supplementary file 2 [file 123620681-supp.zip › Images/supplementary/examples_KITTI_general/1_xfinal_003693916_me.png]

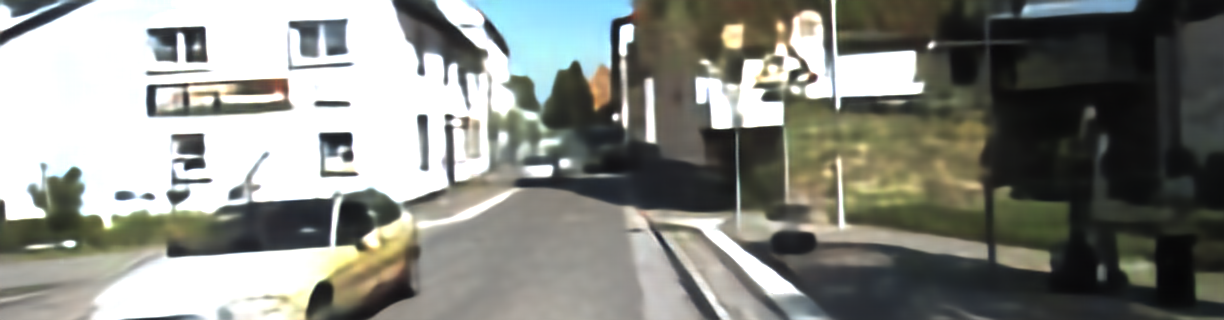

Supplement: Supplementary file 2 [file 123620681-supp.zip › Images/supplementary/examples_KITTI_general/1_xdec_0039310154_me.png]

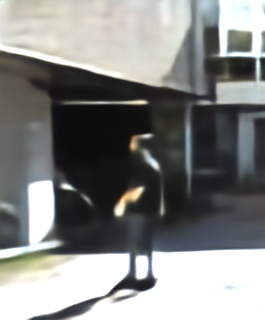

Supplement: Supplementary file 2 [file 123620681-supp.zip › Images/supplementary/examples_KITTI_general/35_xdec_0033773165_me_crop.png]

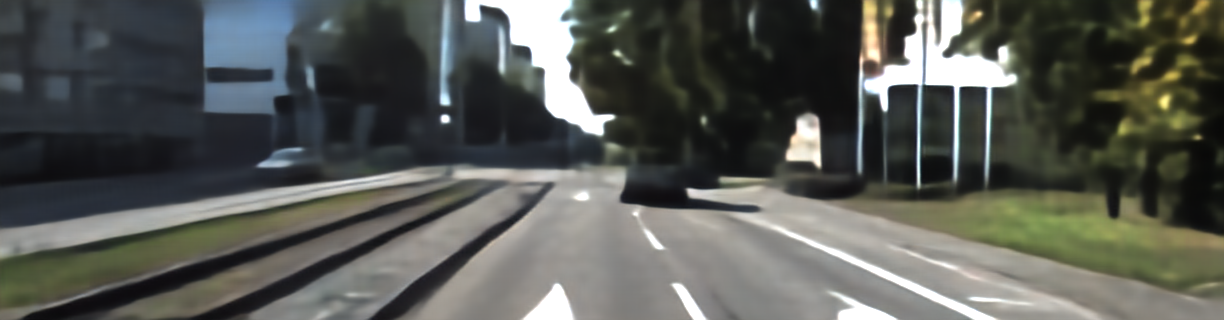

Supplement: Supplementary file 2 [file 123620681-supp.zip › Images/supplementary/examples_KITTI_general/2660_xdec_003105176.png]

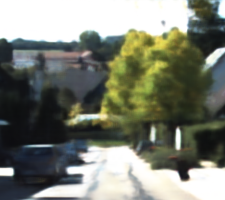

Supplement: Supplementary file 2 [file 123620681-supp.zip › Images/supplementary/examples_KITTI_general/63_xfinal_0032288425_me_crop.png]

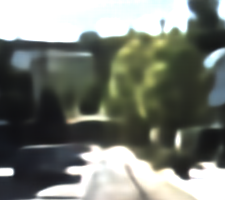

Supplement: Supplementary file 2 [file 123620681-supp.zip › Images/supplementary/examples_KITTI_general/63_xdec_0034615412_me_crop.png]

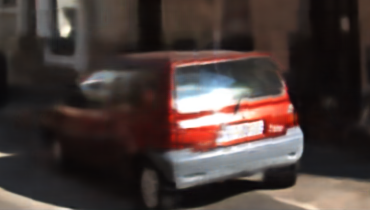

Supplement: Supplementary file 2 [file 123620681-supp.zip › Images/supplementary/examples_KITTI_general/52_xfinal_0029812355_me_crop.png]

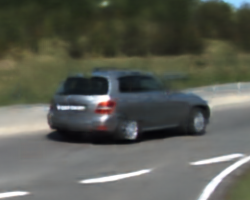

Supplement: Supplementary file 2 [file 123620681-supp.zip › Images/supplementary/examples_KITTI_general/58_xfinal_0027607944_me_crop.png]

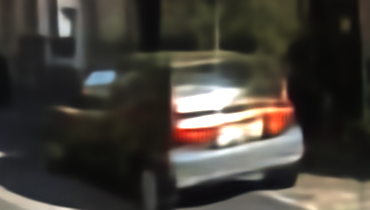

Supplement: Supplementary file 2 [file 123620681-supp.zip › Images/supplementary/examples_KITTI_general/52_xdec_0031331692_me_crop.png]

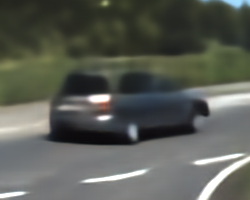

Supplement: Supplementary file 2 [file 123620681-supp.zip › Images/supplementary/examples_KITTI_general/58_xdec_002786204_me_crop.png]

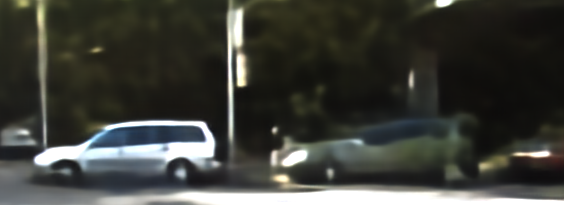

Supplement: Supplementary file 2 [file 123620681-supp.zip › Images/supplementary/examples_KITTI_general/47_xdec_002601288_me_crop.png]

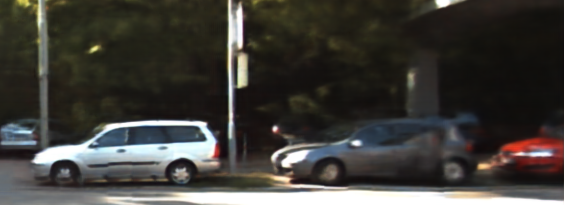

Supplement: Supplementary file 2 [file 123620681-supp.zip › Images/supplementary/examples_KITTI_general/47_xfinal_0025369821_me_crop.png]

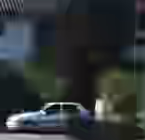

Supplement: Supplementary file 2 [file 123620681-supp.zip › Images/supplementary/examples_KITTI_general_all4/13_x_me_bpg_004551_crop_crop2.png]

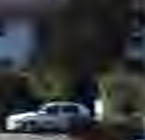

Supplement: Supplementary file 2 [file 123620681-supp.zip › Images/supplementary/examples_KITTI_general_all4/13_x_me_jp2k_004861_crop_crop2.png]

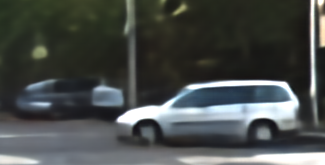

Supplement: Supplementary file 2 [file 123620681-supp.zip › Images/supplementary/examples_KITTI_general_all4/59_xdec_0045342818_me_crop.png]

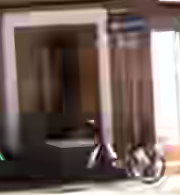

Supplement: Supplementary file 2 [file 123620681-supp.zip › Images/supplementary/examples_KITTI_general_all4/2797_x_bpg_006058_crop_crop2.png]

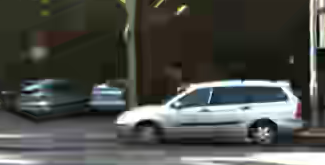

Supplement: Supplementary file 2 [file 123620681-supp.zip › Images/supplementary/examples_KITTI_general_all4/59_x_me_bpg_004971_crop.png]

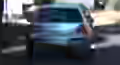

Supplement: Supplementary file 2 [file 123620681-supp.zip › Images/supplementary/examples_KITTI_general_all4/29_x_me_bpg_005470_crop_crop2.png]

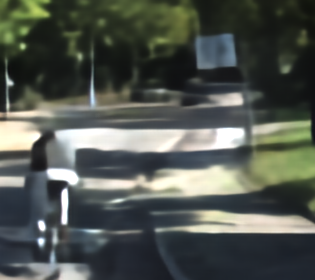

Supplement: Supplementary file 2 [file 123620681-supp.zip › Images/supplementary/examples_KITTI_general_all4/115_xdec_0056135885_me_crop.png]

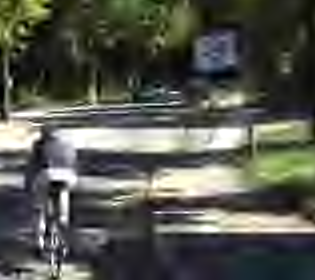

Supplement: Supplementary file 2 [file 123620681-supp.zip › Images/supplementary/examples_KITTI_general_all4/115_x_me_jp2k_006215_crop.png]

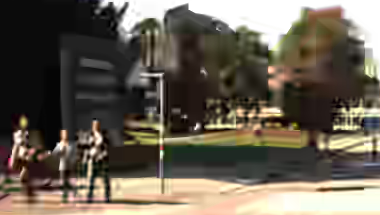

Supplement: Supplementary file 2 [file 123620681-supp.zip › Images/supplementary/examples_KITTI_general_all4/125_x_me_bpg_006379_crop.png]

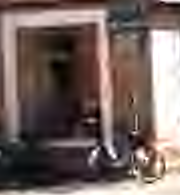

Supplement: Supplementary file 2 [file 123620681-supp.zip › Images/supplementary/examples_KITTI_general_all4/2797_x_jp2k_006227_crop_crop2.png]

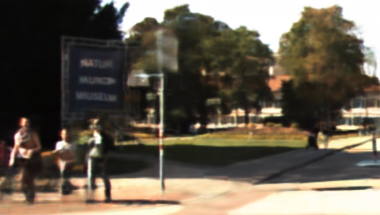

Supplement: Supplementary file 2 [file 123620681-supp.zip › Images/supplementary/examples_KITTI_general_all4/125_xfinal_0057230514_me_crop.png]

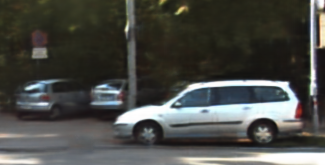

Supplement: Supplementary file 2 [file 123620681-supp.zip › Images/supplementary/examples_KITTI_general_all4/59_xfinal_0045600913_me_crop.png]

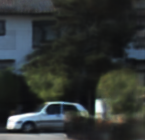

Supplement: Supplementary file 2 [file 123620681-supp.zip › Images/supplementary/examples_KITTI_general_all4/13_xfinal_0044861265_me_crop_crop2.png]

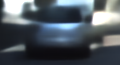

Supplement: Supplementary file 2 [file 123620681-supp.zip › Images/supplementary/examples_KITTI_general_all4/29_xdec_005109943_me_crop_crop2.png]

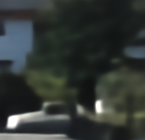

Supplement: Supplementary file 2 [file 123620681-supp.zip › Images/supplementary/examples_KITTI_general_all4/13_xdec_0045077953_me_crop_crop2.png]

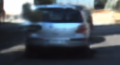

Supplement: Supplementary file 2 [file 123620681-supp.zip › Images/supplementary/examples_KITTI_general_all4/29_xfinal_0048376635_me_crop_crop2.png]

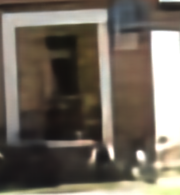

Supplement: Supplementary file 2 [file 123620681-supp.zip › Images/supplementary/examples_KITTI_general_all4/2797_xdec_0058128808_crop_crop2.png]

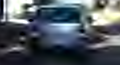

Supplement: Supplementary file 2 [file 123620681-supp.zip › Images/supplementary/examples_KITTI_general_all4/29_x_me_jp2k_005370_crop_crop2.png]

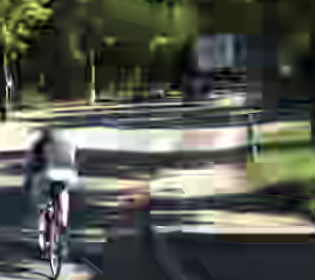

Supplement: Supplementary file 2 [file 123620681-supp.zip › Images/supplementary/examples_KITTI_general_all4/115_x_me_bpg_006244_crop.png]

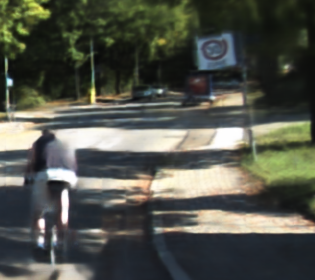

Supplement: Supplementary file 2 [file 123620681-supp.zip › Images/supplementary/examples_KITTI_general_all4/115_xfinal_005711205_me_crop.png]

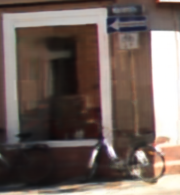

Supplement: Supplementary file 2 [file 123620681-supp.zip › Images/supplementary/examples_KITTI_general_all4/2797_xfinal_005742502_crop_crop2.png]

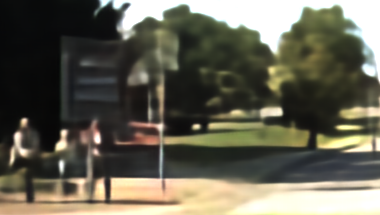

Supplement: Supplementary file 2 [file 123620681-supp.zip › Images/supplementary/examples_KITTI_general_all4/125_xdec_0060373608_me_crop.png]

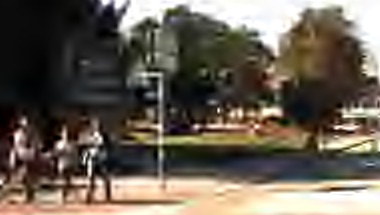

Supplement: Supplementary file 2 [file 123620681-supp.zip › Images/supplementary/examples_KITTI_general_all4/125_x_me_jp2k_006150_crop.png]

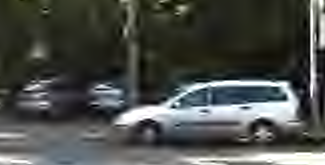

Supplement: Supplementary file 2 [file 123620681-supp.zip › Images/supplementary/examples_KITTI_general_all4/59_x_me_jp2k_004557_crop.png]

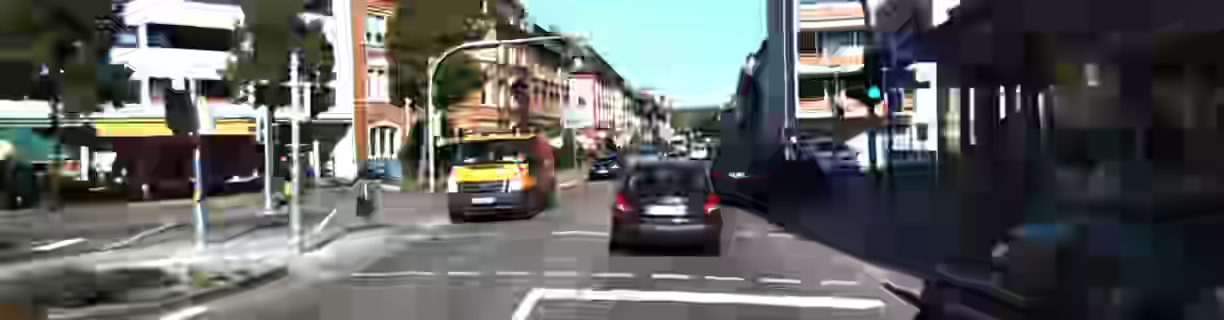

Supplement: Supplementary file 2 [file 123620681-supp.zip › Images/supplementary/examples_KITTI_general_all4/1243_x_bpg_006644.png]

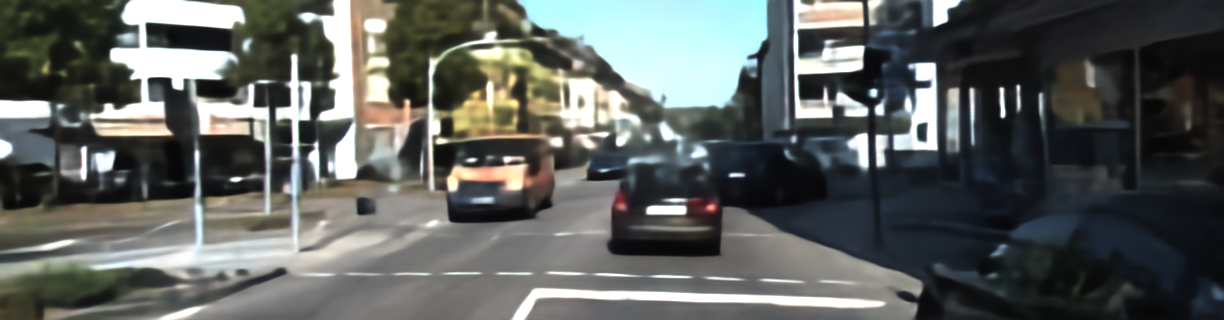

Supplement: Supplementary file 2 [file 123620681-supp.zip › Images/supplementary/examples_KITTI_general_all4/1243_xdec_0060292404.png]

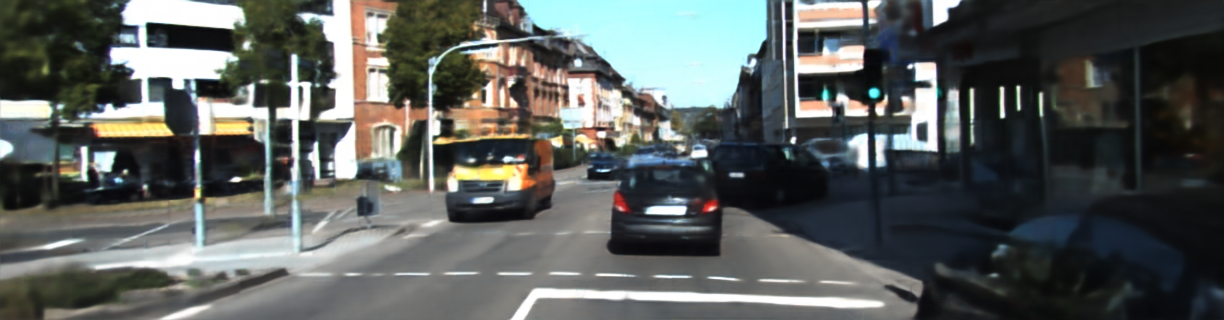

Supplement: Supplementary file 2 [file 123620681-supp.zip › Images/supplementary/examples_KITTI_general_all4/1243_xfinal_0058818784.png]

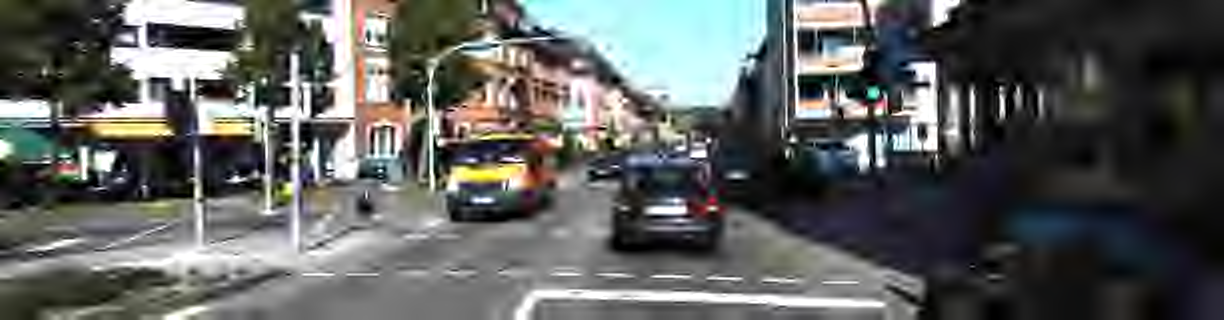

Supplement: Supplementary file 2 [file 123620681-supp.zip › Images/supplementary/examples_KITTI_general_all4/1243_x_jp2k_006319.png]

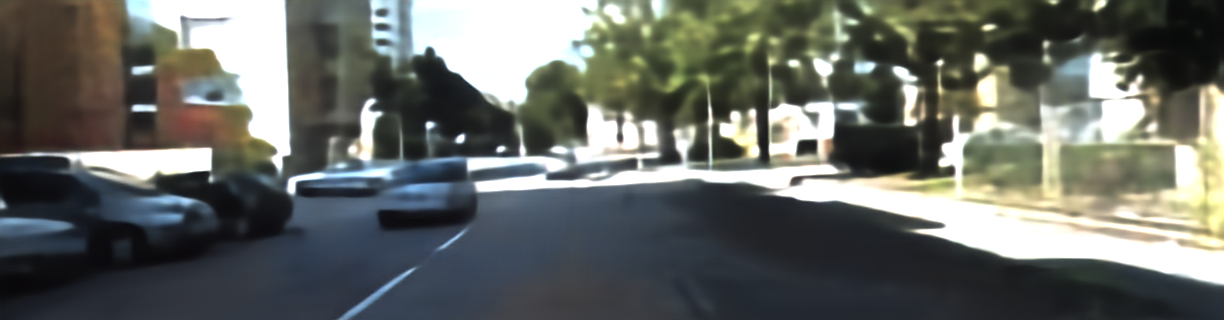

Supplement: Supplementary file 2 [file 123620681-supp.zip › Images/supplementary/examples_KITTI_stereo/328_xdec_003437284.png]

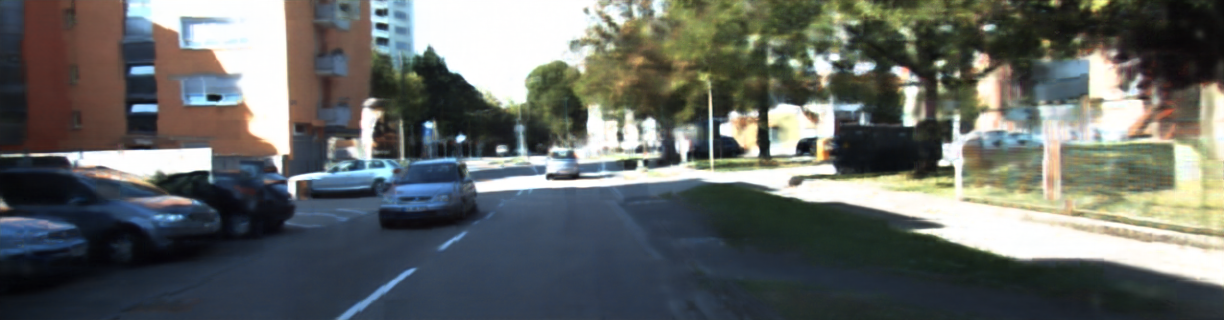

Supplement: Supplementary file 2 [file 123620681-supp.zip › Images/supplementary/examples_KITTI_stereo/328_xfinal_0030829288.png]

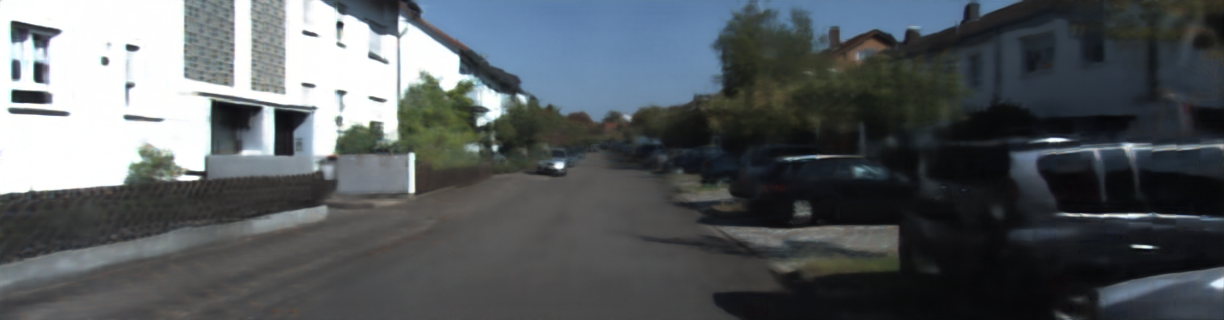

Supplement: Supplementary file 2 [file 123620681-supp.zip › Images/supplementary/examples_KITTI_stereo/111_xfinal_0024876218_me.png]

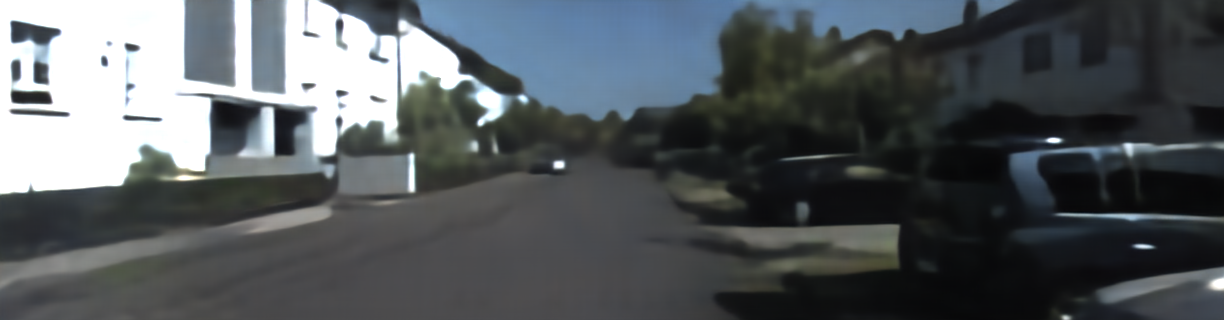

Supplement: Supplementary file 2 [file 123620681-supp.zip › Images/supplementary/examples_KITTI_stereo/111_xdec_0026080817_me.png]

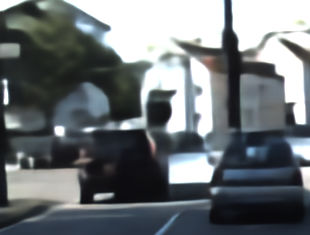

Supplement: Supplementary file 2 [file 123620681-supp.zip › Images/supplementary/examples_KITTI_stereo_all4/121_xdec_0056208216_crop.png]

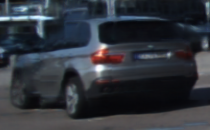

Supplement: Supplementary file 2 [file 123620681-supp.zip › Images/supplementary/examples_KITTI_stereo_all4/343_xfinal_004765772_crop.png]

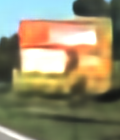

Supplement: Supplementary file 2 [file 123620681-supp.zip › Images/supplementary/examples_KITTI_stereo_all4/36_xdec_0051271997_me_crop.png]

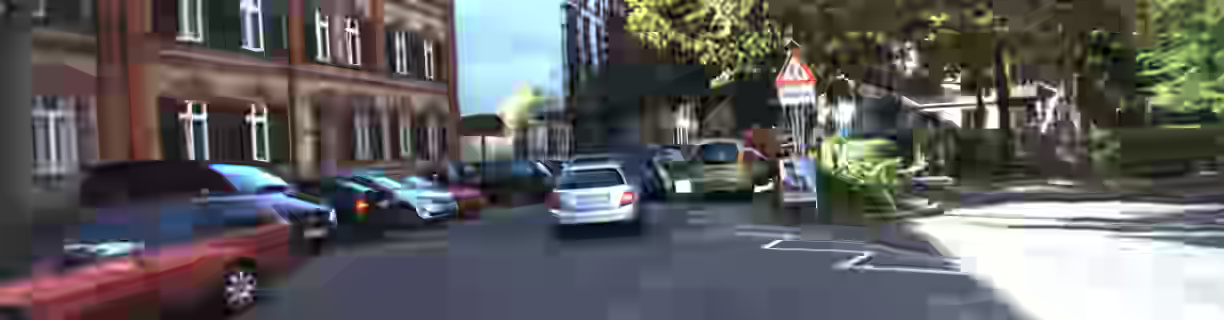

Supplement: Supplementary file 2 [file 123620681-supp.zip › Images/supplementary/examples_KITTI_stereo_all4/155_x_bpg_005770.png]

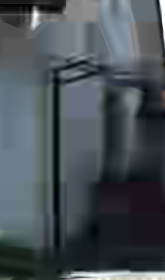

Supplement: Supplementary file 2 [file 123620681-supp.zip › Images/supplementary/examples_KITTI_stereo_all4/0_x_me_bpg_005341_crop.png]

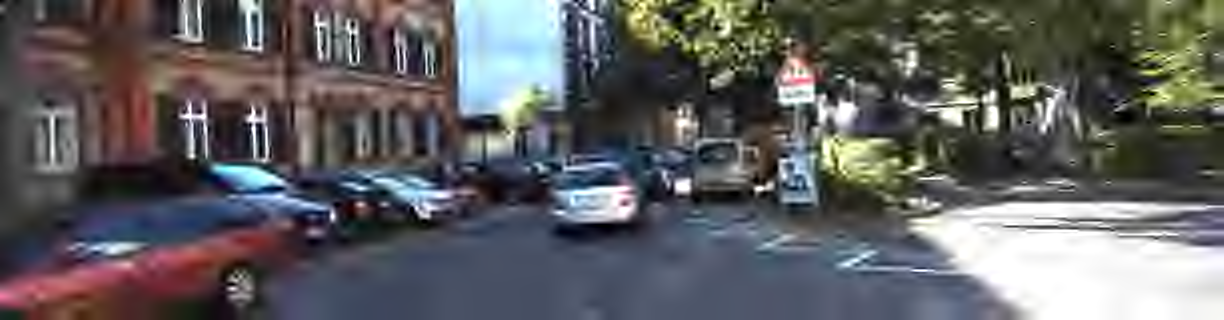

Supplement: Supplementary file 2 [file 123620681-supp.zip › Images/supplementary/examples_KITTI_stereo_all4/155_x_jp2k_005225.png]

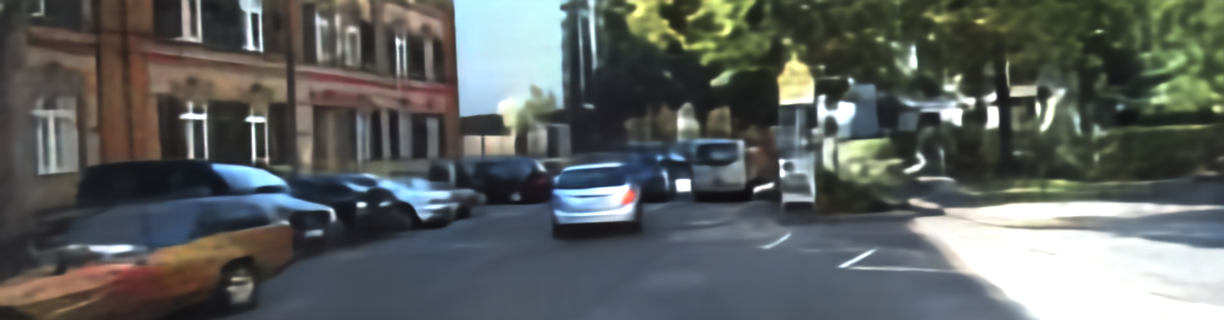

Supplement: Supplementary file 2 [file 123620681-supp.zip › Images/supplementary/examples_KITTI_stereo_all4/155_xdec_005241834.png]

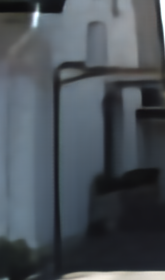

Supplement: Supplementary file 2 [file 123620681-supp.zip › Images/supplementary/examples_KITTI_stereo_all4/0_xdec_0048583426_me_crop.png]

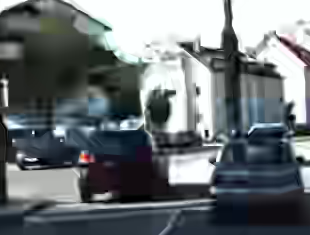

Supplement: Supplementary file 2 [file 123620681-supp.zip › Images/supplementary/examples_KITTI_stereo_all4/121_x_bpg_005790_crop.png]

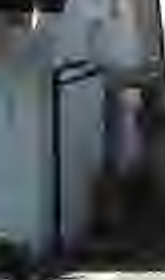

Supplement: Supplementary file 2 [file 123620681-supp.zip › Images/supplementary/examples_KITTI_stereo_all4/0_x_me_jp2k_005321_crop.png]

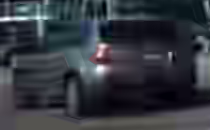

Supplement: Supplementary file 2 [file 123620681-supp.zip › Images/supplementary/examples_KITTI_stereo_all4/343_x_bpg_005435_crop.png]

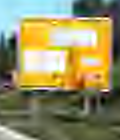

Supplement: Supplementary file 2 [file 123620681-supp.zip › Images/supplementary/examples_KITTI_stereo_all4/36_x_me_jp2k_005125_crop.png]

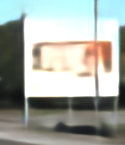

Supplement: Supplementary file 2 [file 123620681-supp.zip › Images/supplementary/examples_KITTI_stereo_all4/138_xdec_0051976908_crop.png]

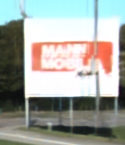

Supplement: Supplementary file 2 [file 123620681-supp.zip › Images/supplementary/examples_KITTI_stereo_all4/138_xfinal_004793801_crop.png]

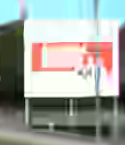

Supplement: Supplementary file 2 [file 123620681-supp.zip › Images/supplementary/examples_KITTI_stereo_all4/138_x_bpg_005335_crop.png]

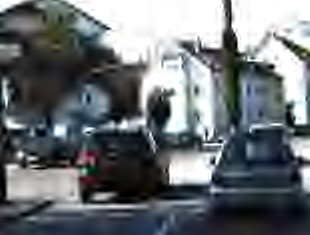

Supplement: Supplementary file 2 [file 123620681-supp.zip › Images/supplementary/examples_KITTI_stereo_all4/121_x_jp2k_006048_crop.png]

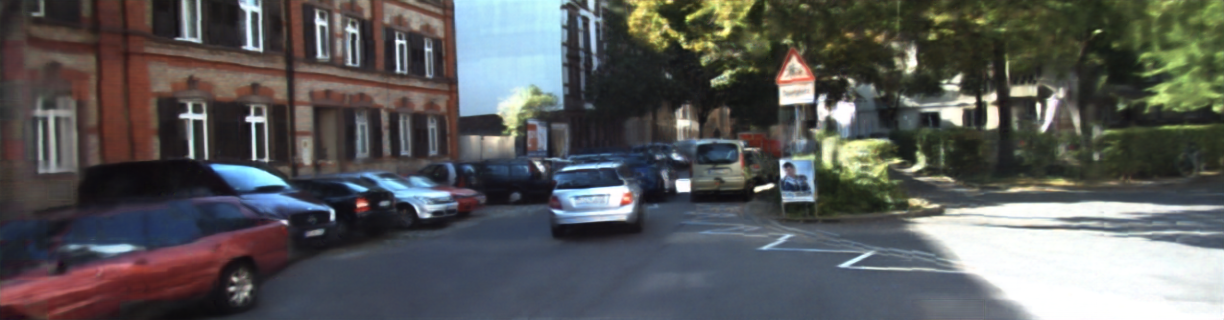

Supplement: Supplementary file 2 [file 123620681-supp.zip › Images/supplementary/examples_KITTI_stereo_all4/155_xfinal_0051195394.png]

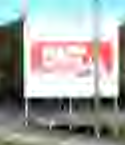

Supplement: Supplementary file 2 [file 123620681-supp.zip › Images/supplementary/examples_KITTI_stereo_all4/138_x_jp2k_005319_crop.png]

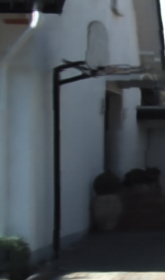

Supplement: Supplementary file 2 [file 123620681-supp.zip › Images/supplementary/examples_KITTI_stereo_all4/0_xfinal_004762899_me_crop.png]

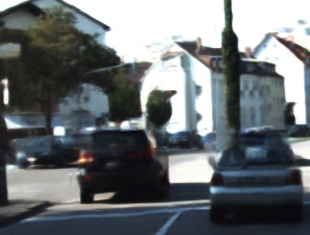

Supplement: Supplementary file 2 [file 123620681-supp.zip › Images/supplementary/examples_KITTI_stereo_all4/121_xfinal_0055852156_crop.png]

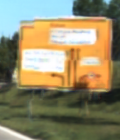

Supplement: Supplementary file 2 [file 123620681-supp.zip › Images/supplementary/examples_KITTI_stereo_all4/36_xfinal_004743475_me_crop.png]

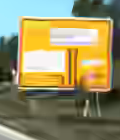

Supplement: Supplementary file 2 [file 123620681-supp.zip › Images/supplementary/examples_KITTI_stereo_all4/36_x_me_bpg_004998_crop.png]

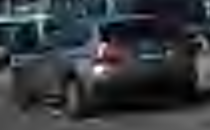

Supplement: Supplementary file 2 [file 123620681-supp.zip › Images/supplementary/examples_KITTI_stereo_all4/343_x_jp2k_005304_crop.png]

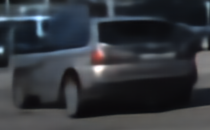

Supplement: Supplementary file 2 [file 123620681-supp.zip › Images/supplementary/examples_KITTI_stereo_all4/343_xdec_0050599568_crop.png]

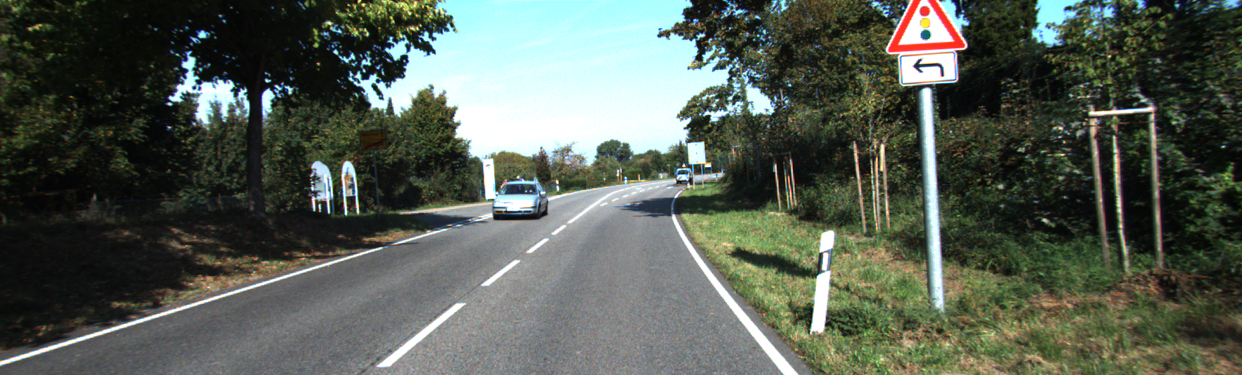

Supplement: Supplementary file 2 [file 123620681-supp.zip › Images/supplementary/dataset_example/000129_07_L.png]

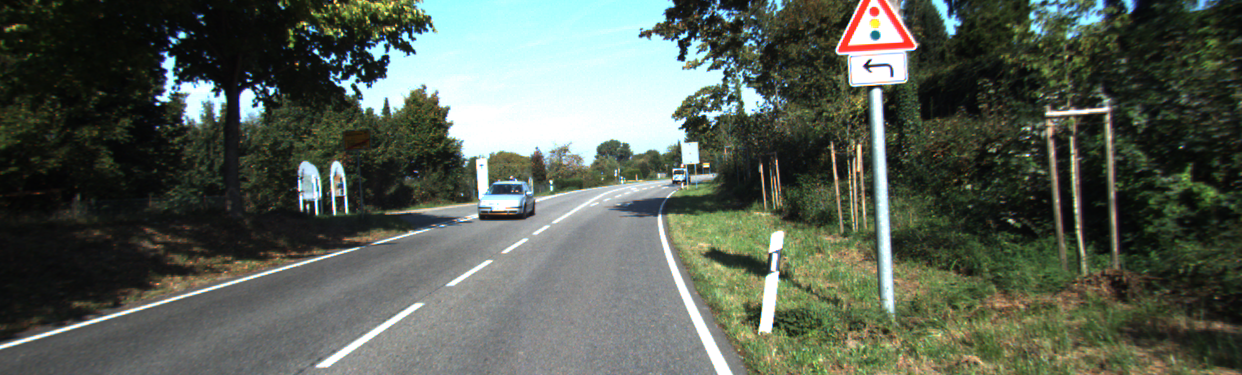

Supplement: Supplementary file 2 [file 123620681-supp.zip › Images/supplementary/dataset_example/000129_07_R.png]

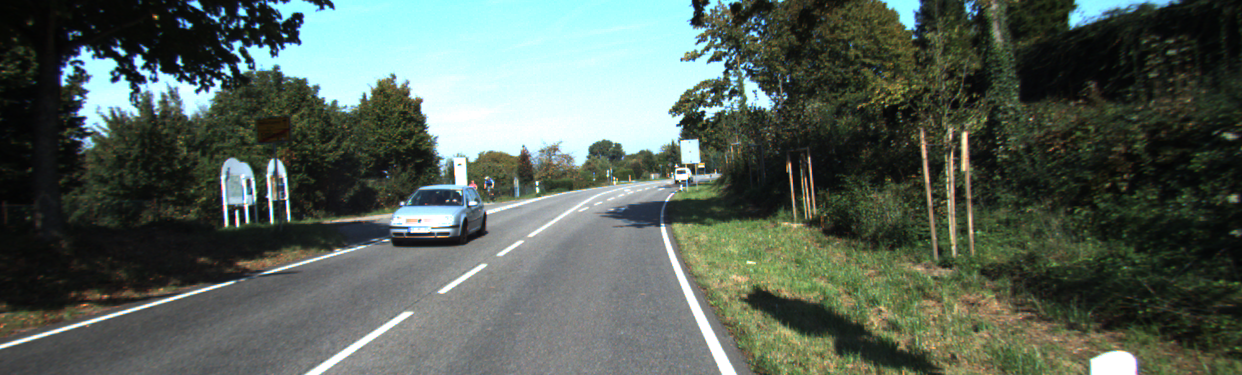

Supplement: Supplementary file 2 [file 123620681-supp.zip › Images/supplementary/dataset_example/000129_10_R.png]
